# Supplementary material for: Antennal Transcriptome Evaluation and Analysis for Odorant-Binding Proteins, Chemosensory Proteins, and Suitable Reference Genes in the Leaf Beetle Pest Diorhabda rybakowi Weise (Coleoptera: Chrysomelidae)
Source: MDPI journal article supplement (doi:10.3390/insects15040251), 2024-04-07
Supplement: s1 [file s1]

### Phylogenetic tree of DrybCSPs

>OR797794 DrybCSP1 chemosensory protein 1, complete cds [Diorhabda rybakowi Weise]

ATGAAATTTCTCTTCTCGTTTGTGTTGTATTAGTGATAGTAGTGGTTTCGCCAGACCCGAAGACACATATAC  
AACAAATATGATAATATTGATATTGACGAAATTATTCACAACGATAGATTATTGAGGAGTTACGTGGATTGTC  
TGATAGGAACCTAAGCCTTGTTCAAAGATGGAGAGGAGCTGAAAAAGGTTTTCAGGGAAGCGTTGAAAC  
TAAATGTTCTAAATGTAGTGAACCACAAAAAGAAGCTTCGAAGAAAATAGGCAAATACCTGATAGAGAACAA  
GAGATCATGGTTTGTAGAGCTTGTAGAAGTTTTTCGATCCAGACCACTCAAATTGGAACCTTATAGAGAAAA  
TCTTAAAGCTGAAGGAATTGAATTAA

>DrybCSP1

MKFSLLVCVVLVIVVVSARPEDTYTTKYDNIDIDEIHNDRLLRSYVDCLIGTKPCSKDGEELKKVFREALETKSKC  
SEPQKEASKKIGKYLIENKRSWFDELVEVDFDPHDKLELYRENKAEIGEL

>OR797795 DrybCSP2 chemosensory protein 2, complete cds [Diorhabda rybakowi Weise]

ATGAAACTAGCAATTGTAGTTGTTTGTGTTTCACTAGTGATAGTGGCAGTTTCTGCAGACCATTCTGATGAAA  
AATATACCTCAAAGTATGATAATGTTAATTAGATGACATTATCAAAAGTGATAGATTACTAAGGAATTATATTG  
ATTGCTTCTGGAACCAAGAAATGTACTAAAGATGGCGAAGAATTGAAAAGGGTTCTACCGGACGCATTG  
AAAACCAATGTGCTAAATGTACTGACACTCAAAAAGAAGGAGCTAAAAGATTTAAGACATTTATTGAAA  
AATAACGACAATGGTTCGACGAACTTGAAGCTTATTACGATTCCGACCACGTTTATCTGAAAAGCTACGAA  
AAAGAGCTTAAAGAAGAAGGAATAGAAGTGTA

>DrybCSP2

MKLAIVVVCVSLVIVAVSAAPSDEKYTSKYDNVNLDDIIKSDRLLRNYIDCLLGTKKCTKDGEELKRVLPDALKTC  
AKCTDTQKEGAKILRHLLKNKRQWFDELEAYYDSHVYLSYEKELKEEGIEV

>OR797796 DrybCSP3 chemosensory protein 3, complete cds [Diorhabda rybakowi Weise]

ATGAATCGTTGGTGCATATCGGTCGTAATCATGGTATTGATTGTGGTAGCAGCAGTGCCTGTGCTCCGAAGA  
GTTATGATGAGAATTTGAAGATTATTAAGAAAATAGATATCGATCAAGTGTGAACAATGATAGAATTATCAGA  
AATTACGTCGATTGTGTCTTAGGAAAGAAACGTTGTACTAATGAAGGAAATGCTTTGAAAGAAAGCTGGAA  
AGACGGTTTAGACAAAGGATGTGATAATTGCGATGAAGAAGACAAGAGGAAAGTGAAAAAATCTTAAAA  
CACATATACCAAACACCGAGATTATACGATGAATTGGCTGCCACCTTGACAAAGATGGTAAATACCGTG  
AAAAATACCAAGCTCAAATCGATGAAATTCTCAAGGATCAAACCTCTATGA

>DrybCSP3

MNRWCISVVLMLIVVAHVHCAPKSYDENLKIKKIDIDQVLNNDRIIRNYVDCVLGKKRCTNEGNALKESWKD  
GLDKGCDNCDEEDKRKVKKILKHIYTKHRDLDELAHLDKDKYREKYQAQIDEILKDQTL

>OR797797 DrybCSP4 chemosensory protein 4, complete cds [Diorhabda rybakowi Weise]

ATGGGGTTAATACGATTATTTGTTTATTGGCGTTGGTATCTTGTAGTTTAGCTCAAACCTACAATACTAGATAT  
GATAACATCGACATTGACCGAATTTAGCTAGTAAAAGATTGTTAGATAATTATATACAGTGTCTTTAGAAGA  
GAACGTTAAAAGGTGTTCAACGAGAAGGACGGGAATTTAAAAAATACATACCTGAAGCAATTCAAACCAACT  
GTGCTAAATGTTGATTTCCAAAAAAGAATTGTGAAAAAACTGCCAAACATATAATAACCAATAGACCAC  
AAGATTGGGAGAAAATTAACAGAAGTTTGATCCTCAAGGAACATATCATCAAAGTTTCAATAATTTCTTAAA  
TAGTCCATA

>DrybCSP4

MGLIRLFVLLALVSCSLAQTYNTRYDNIDIDRILASKRLLDNVYIQCLEENVKRCSPGREGFKYIPEAIQTNCAKCS  
DSQKRIVKKTAKHIITNRPQDWEKIKQKFDPPQGTYHQSNNFLNSP

>OR797802 DrybCSP5 chemosensory protein 5, complete cds [Diorhabda rybakowi Weise]

ATGCAGATATTTAGTTTGGTGTAAATTTTTGATCTTCTGGTATCAATACTACCGTAGCAGCGGCTGTTAC  
AGAAAAATCTACGACTCTAAGACCTTCCATCTCAGATGAAGCTTTAGAAGCCTCCCTAAAAGACAAAAGATA

TCTACATAGGCAACTGAAATGTGCTATAGGAGAAGCCCCGTGTGATGCAGTAGGTCGTAGATTGAAAAGTTT  
GGCTCCGTTGGTTTTGCAAGGTTTCATGTTCTCAATGTACACCTCAGGAGCAACAACAAATTAGGAAAAGTTT  
GGCATATATGCAAGTTAATTTCCGAAAAGATGGAATAAGATATTGAAACAATATTCCGGATAA

>DrybCSP5

MQIFQFGVIFLFLVSITTVAHAVTEKSTTLRPSISDEALEASLKDKRYLHRQLKCAIGEAPCDAVGRRRLKSLAPLVL  
QGSCSQCTPQEQQIRKVLAYMQVNFPEWNNKILKQYSG

>OR797798 DrybCSP6 chemosensory protein 6, complete cds [Diorhabda rybakowi Weise]

ATGGTACCGTTAATCTGCATACTAGTTGCAGGGTTAAGTGGGTTAGTAGATTCCGGCTCCAGTTTCTGATCAAA  
ATCAACAATACTACACCACGAAATATGATCATGTTCGATATAGAAATGATATTAAAGAATAGGAGATTGATTTTTT  
ATTACACGGCGTGTATGCTCAATAAAGGACCATGTTTACCTGAAGGACTAGAATTTAAAAAACTTATACCAGA  
TGCCATACGAACTAATTGCAAAAGATGTACCGACAAACAAAAAGTTACGACTGTTTCGAGCAATACAAGGTTT  
GATGAAAGAATACGAAAAAATATGGGAACAACTCAAAACCGAATGGGATCCCGACGATATATATGTGAAAAA  
ATTCCTCGAAACGCACGGTAACGTTCCCAATCCGAATATAATTTAAACAGATTCGATGGTGGTGAAGAATCT  
GACGATACGTCCACAGAATCGTCTTCTACTACGTCTACTAAATCCCCTTACAATACTCTCCAGTTATATTTTCA  
GGTCCGGTACCAACTTTAAACCCAGAACTATCCCTATAGCTAATGCAATTGGACAAAGTATAAAAGCTACGA  
TTTATGGAATTTCTCAATTCTGTCATACGTTTAAAGTAAGTCTCATTGTTCTATTGCATCAAATTACATCAACTGT  
GACTGAGGCCTCTGTCAAATCTTCTAAGACCTTAG

>DrybCSP6

MVPLICILVAGLSGLVDSAPVSDQNQQYYTTKYDHVDIEMILKNRRLIFYTACMLNKGPCSPGLEFKKLIPDAI  
RTNCKRCTDKQKVTVRAIQGLMKEYEKIWEQLKTEWDPDDIYVKKFLETHGNVPNPNIILNRFDDGGEESDDT  
STESSSTSTKSPYNTPPVIFSGPVPTLNPETIPIANAIGQSIKATYIGISQFCHTFKVSILVLLHQITSTVTEASVKFFL  
RP

**Phylogenetic tree of Coleopteran CSP sequences**

>AXG21598.1 AmalCSP5 chemosensory protein 5 [Agrilus mali]

MGNRNWIFLSIFLTVLVTTLAQRHIIIGRLQSVNLEQVLNNDRLFNNFYKCLADEGKCSNDAKSIKNLLPEVVTK  
CGQCTADERSQIKKSLNLVRKNKPEQFNSLAAKYDEGVWVKELVR

>ALR72526.1 CbowCSP12 chemosensory protein 12 [Colaphellus bowringi]

MKEGKARKLSQCYSFHGHEQCKYISLKMFLPFVLSCLITLSISAVPEKSRYTTKYDNINLEEIIHNDRLLNKYVDCL  
LDKGRCTPDGLELKKNPDAIETDCSKCSDKQKEGSEIMMRYLIDNKPEYWNPLQEKYDPSGSYKKRYLDAKK  
TEVSVEPIVKS

>ALR72519.1 CbowCSP5 chemosensory protein 5 [Colaphellus bowringi]

MKASALFFVAFFAVVATKPAEKYTTKYDNVDLDTILKSDRLLKNYVNCCLDKGNCTPDGAELKKVLPDALQTDCS  
KCSDVQKRGSKKIIRYLIDNKAEWYKELEAKYDKNGVYKKKYDKELEDAKV

>AXF53965.1 DarmCSP2 chemosensory protein 2 [Dendroctonus armandi]

MKFCVVLVLVLQISICLCQTYSSRFDNINIDEILSNKRVLNMYVRCVLDEGPCTAEGRELRTHIPEALRTNCAKCTP  
SQQKFVRKGASFLIKNDPDQWKRTKKFDPEGKFASQFHQFLNA

>QPZ89236.1 DadjCSP2 chemosensory protein 2 [Dendroctonus adjunctus]

MKFCGVLVLLLQIAVCLCQTYTSRFDNINIDEILSNKRVLNMYVRCVLDEGPCTAEGRELRTHIPEALRTNCAKCTP  
SQQKFVRKGANFLIKNDPNQWSRITKKFDPEGKFAAQFHQFLNA

>AIX97072.1 DhelCSP4 chemosensory protein 4 [Dastarcus helophoroides]

MKFDIPLILIVTVASVKVPVEYYATKYDHLDIRILNRRMVNYASCLLNKGPCPPQGTEFKRILPEALETNCAR  
CTEKQKFVYHTIKRLKKEYPKIWWQLEAQWDPNHTFIPLFEASFIASSTSPSTTSTTVVPDLGNRFGENKNETET  
FPYPAEAVASGATLLPNLQQTTAFSSSIQSTHSTNTQHTTPPYLSYSTTKRYNVKQQQNTVSYGFNIVGDVIKNIG  
IFSVRVAETGKQLANVLISLHI

>ARM20140.1 GdauCSP4 chemosensory protein4 [Galeruca daurica]

MGLIRLIFLFAVVVSCSLAQTYNTRYDNIDIRILGSKRLLDNYLQCLLDENVKRCSPGREGFKRYIPEAISTNCAKCS  
DSQKRIVKKTAKYIITNRPQDWEKIKQRFDPQGKYHQSFNDFLNSP

>ARM20141.1 GdauCSP5 chemosensory protein 5 [Galeruca daurica]

MFSLVVVLCAGLSSAAVTEKAKYTTKYDNVNLEEIVHSDRLLKSYVDCLEKKGKCTPDGLELKKNMPDAIATDCS  
KCSEKQREGSEYMMRFLIDNKPDYWNPLQEKYDPSGAYKQRYLESKKQEVKVEPITKT

>ARM20145.1 GdauCSP9 chemosensory protein 9 [Galeruca daurica]

MNFFCVSILIGFLMVVAVSGAPKTFEENVATLKKVDLKAFLQNTRIMRAYVDCVVHNTHTCTPESTALKESWKEG  
LDQGCADPCDEEAKKRVQIIAKYVYTEQPEWYKEIEALDKDKKI

>ARM20143.1 GdauCSP7 chemosensory protein 7 [Galeruca daurica]

MKTFLILFIAATGSYVFAEKYTTKYDNVDIDTIKSDRLLLNYNVCLLDRGKCTPDGLELKKVLPDALLTDCSKCSET  
QKKGSKKIIRHLIDNKPWNWYKELEEKYDKNGTYKIKYEKEIRA

>ARM20139.1 GdauCSP3 chemosensory protein 3 [Galeruca daurica]

MNRWCISVVLMLVAVVAAVHCAPKSFENLKVLLKIDINQVLNNDRIIRNYVDCVLGKKRCTNEGNALKESWK  
DGLDKGCDDCDEEDKRKVKILKHMYTKHRDLYDELAHLDKDGKYRDKYQAQIDEILKDPTL

>ARM20138.1 GdauCSP2 chemosensory protein 2 [Galeruca daurica]

MNILRNARMLKRYVECLLDVPTCTKDGDYLYKQVLPFAIKTNCAECDAKQDDTAVRVMAYLMKYHDDWWKK  
IDARYQASTSEFLARKAKIEEYKNTL

>ARM20137.1 GdauCSP1 chemosensory protein 1 [Galeruca daurica]

MKLSLVVCVILAVVVVSAKPEEKYTTKYDNINIDEIINNDRLRSYVDCLLGTPCTKDGEELEKVFKEALDSKCSK  
CSDAQKEAAKKIGIYLIKNNRPWFDELVEVFPDHTKLEQYKDELKAEGIEL

>ARM20144.1 GdauCSP8 chemosensory protein 8 [Galeruca daurica]

MKLAIVVCVSLVIVAVAAAPADEKYTSKYDNINLDDIISDRLLRNYIDCLLGTKKCTKDAEELKRVLPDALKTKCAK  
CTEAQKNGAKKILRHLLKNKREWFNELEAVYDPEHVYVKSYEKELKEEGIEL

>ADX96028.1 HoblCSP1 chemosensory protein CSP1 [Holotrichia obliata]

MRLIFYSFLIYLAIDERYTTKYDNIDIDAVISTERLLQNYIKCLLDLVVCTEEGSELKKNMPDAIQNDCSKCSDKQK  
EGSDKLILYLINNKPEYWQLLEEKYDPTGENTKKFIEFKRMMTERTAMYATVSK

>AIX97045.1 MaltCSP5 chemosensory protein 5 [Monochamus alternatus]

MKLVVFLFFVALCGITYGRPDDKYTTKYDNIDLDEILKNDRLLRAYVDCLLGTTKCTNDGEELKKVLPEAIDNECA  
KCSEKQKDGAKKVHLYIDNKSDWWKELEVVDPTGKYRKKYEEQAKKEGLKI

>AIX97040.1 MaltCSP8 chemosensory protein 8 [Monochamus alternatus]

MLKMIIYFLVAIGLITYATSTVTERTKYTTKYDNIDLDEIHNERRLLKNYVDCLEKGRCTPDGLELKKNMPDAIETD  
CSKCEKQKQEGSEIIRYLIDNKPEYWNPLQDKYDPTGSYKKRYLDAKKTENVVEPIVKS

>AIX97041.1 MaltCSP1 chemosensory protein 1 [Monochamus alternatus]

MHFKCQIALLLCIAVMTIVTEAFPQADTERSEVSDEALESTLKDRLMRQLKALGEAPCDPVGRRKSLAPLVL  
QGSCSQCSPELNQIRKVLSYMQINFPKEWNRVLKQYSR

>AIX97046.1 MaltCSP6 chemosensory protein 6 [Monochamus alternatus]

MVCLLPVLVTGTLLGLIDGANAQYASKYDHIDVDAILNNRRIVNYAACLLTGKPCPEGIEFKRILPEALRTNC  
QRCTEKQKTVTLRAIRRLKKEYPKVWAQLEKQWDPDGSYISKFESTFGAKSTESIPESVQIVNRYASPEDNKTIE  
NALSQIFTTPLPTSTSTSTSTTTATTSTTTAKTTTTSKATTVSTKAAPVTKTTHRVSTINIKNINTISSSTKPT  
KRPRPSIGQSIQATVSGTNIIVGLVRGLEAIGNRVVETGAEIAGVVLKNIARPL

>AIX97085.1 MaltCSP10 chemosensory protein 10, partial [Monochamus alternatus]

MLYLSSLICLVCISSVIGQKYSNKYDHIDIRILSSKRVLLNNYIKILDQGPCTPDGREFRDHIPEAITTNCVKCTDA  
QVKIIRKTSAHIMNNRPEDWEKIKNKFDPPEEKYKDSFMKFIDG

>UMT69261.1 OcomCSP9 chemosensory protein 9 [*Ophraella communa*]

MGFARLIFLLAVVSYSFAQTYNTRYDNIDIDRILASKRLLDSYIHCLLDNFKKCSPEGREFKKYIPEAIHTNCGKCS  
DSQKRIVKKAACHIIQNRPDWDKIRKKYDPERKYQQSFNTFLNSP

>UMT69263.1 OcomCSP11 chemosensory protein 11 [*Ophraella communa*]

MQTFQPLILLIVFVSVIVVKAATEKSSSTERPSISDEALEASLKDKRYLLRQLKCAIGEAACDSVGRRLKSLAPLVL  
QGSCSQCTPQEQRQIRKVLGYMQVNFPEWNNKILKQYSG

>APC94216.1 PmacCSP3 chemosensory protein 3 [*Pyrrhalta maculicollis*]

MVPLICAIVVGLSGLVVPAPVLEDGEQYYTTYDHDVEMILNNRRLVNYAACMLNKGPCPEGLEFKRILPDA  
IQTNCKTEKQKATTLRAIKRLMKEYKKIWDQLKAEWDPDDVFVKKFLETYNKPTSTVSNIFSNRFDDEEVSEQ  
TQTPLNKPKPEMKSSSTAPSTSTTTSTTSATLGVFSPKTTTRAPAPNAVNPLANTLGQTIKATVSFGNNIARQVI  
KDIETIGNTVISTGVEIGNRVIQTGTQIAGALTGIPRPVNRFN

>APC94294.1 PaenCSP1 chemosensory protein 1 [*Pyrrhalta aenescens*]

MKFVLVFFVLGVIAVTARPEDDKYTTYDNNIDELIQNDRLLRNYVDCLLGTGPCNKDGEELKKVLKDGLRTKC  
AKCNDTQKEAAKKLAIHLIKNKKPWDELTPVYDPDHTIVELYREDLKAEGIEL

>APC94212.1 PmacCSP1 chemosensory protein 1 [*Pyrrhalta maculicollis*]

MKFVLVFFVLGVIAVTARPEDEKYTTYDNNIDEIINRLLRNYVDCLLGTSCNKDGEELKKVLKDGLRTKCA  
KCNDTQKEAAKKLAIHLIKNKKPWDELTPVYDPDHTIVELYREDLKAEGIEL

>APC94213.1 PmacCSP8 chemosensory protein 8, partial [*Pyrrhalta maculicollis*]

KYDNNIDEIINRLLRNYVDCLLGTGPCSKDGEELKKVFKEGVDSKCAKCNKQKEAAKKIAVHLIKNKRQW  
FDELSAVFDPDHKIEEYREDLKAEGI

>EFA07417.1 TcasCSP3 chemosensory protein 3 [*Tribolium castaneum*]

MLFTVFLVLTCAHVVFLEEYVIPDNIDIDILSNERLLKNYVNCLLDKGRCTPEGKKLKSTIPEALSTDCAKCNEKVK  
ANVRKVLHHLIDNKPDMWKQLEAKYDPSGEYRSKYKDELEKNGIHV

>EFA07418.1 TcasCSP4 chemosensory protein 4 [*Tribolium castaneum*]

MFKVLVFFVACVQAYVYAEETVPQNDIDEILKNDRLTKNYLDCILEKGKCTPEGEELKKDIPDALQNECAKCNE  
KHKEGVRKVIRHLIKNKPWWQELQEKYDPKGEYKSRYNHFLEEGLN

>EFA07419.1 TcasCSP5 chemosensory protein 5 [*Tribolium castaneum*]

MTAIVFLLALACLTYVSSQEYLVQNDVDEILKNDRLTRNYLDCVLGKGKCTPEGEELKKDIPEALQNGCAKCN  
EKHKEGVRKVIHHLIENKPNWWQELESKFDPQGEYKKKYDELLKKEGLAN

>EFA07420.1 TcasCSP2 chemosensory protein 2 [*Tribolium castaneum*]

MFATSALFACIQGLVSAEYLVQNDLDEILKNDRLTRNYIDCILGKGKCTPEGEELKRDIPALQNECAKCNEK  
HKEGVRKVLHHLIKNKPWWQELEAKFDPKGEYKQKYNKLEKEGLQA

>EFA07421.1 TcasCSP6 chemosensory protein 6 [*Tribolium castaneum*]

MFLAIVLVVCACTNVLSEETNQYNDELDAALKSERLMKSYFECLLGTGKCTPSGEELKKDIPDALKNECAKCND  
KHKEGIRKVIHYLVKQKPEWWEQLQKKFDPQGIYKKRYQNYLDKEGLKA

>EFA07640.1 TcasCSP8 chemosensory protein 8 [*Tribolium castaneum*]

MIFKIHFLVFGALLTYVSSVEYLILREIDTILKNDQMTRNYLDCVLGKGKCTKEAEKLGKITETMKNKGCVKCEQK  
QKEDVHKVFQHLMIHRPNWWHELETGFNPHEIKLQHLHQSKFNPHEEVKLQHLHQFPHHDFLE  
REGFIR

>KYB26756.1 TcasCSP13 chemosensory protein 13 [*Tribolium castaneum*]

MIPLIAIAGILAVSAAPAEFYESRYDHLDESILNNRRMVNYAACLLSKGPCPPQGVDLKRVLPEALQTNCAKCT  
EKQRTAAYRSIKRLKKEYPKIWEQLRAVWDPDDVFIRKFETSFESGKPSGVISTNTSPSPILSNRFGENEEADAAS  
NVISSTPLPPTSTTTTTLTKFTTKPSTKPTNKPVVVTKPPQAPPFATVGANLQATVSFGTNLVGGIVRSLGLTG  
SRVVESGTKLANMVISAAIRP

>[NP\\_001039283.1 TcasCSP9 chemosensory protein 9 precursor \[Tribolium castaneum\]](#)

MTAIVFLLALACKTYVSSQEYLVQNIDVDEILKNDRLTRNYLDCVLGKGKCTPEGEELKKDIPEALQNGCAKCN  
EKHKEGVRKVIHHLIENKPNWWQELESKFDPQGEYKKKYDELLKKEGLAN
