# Supplementary material for: Antennal Transcriptome Evaluation and Analysis for Odorant-Binding Proteins, Chemosensory Proteins, and Suitable Reference Genes in the Leaf Beetle Pest Diorhabda rybakowi Weise (Coleoptera: Chrysomelidae)
Source: MDPI journal article supplement (doi:10.3390/insects15040251), 2024-04-07
Supplement: s1 [file s1]

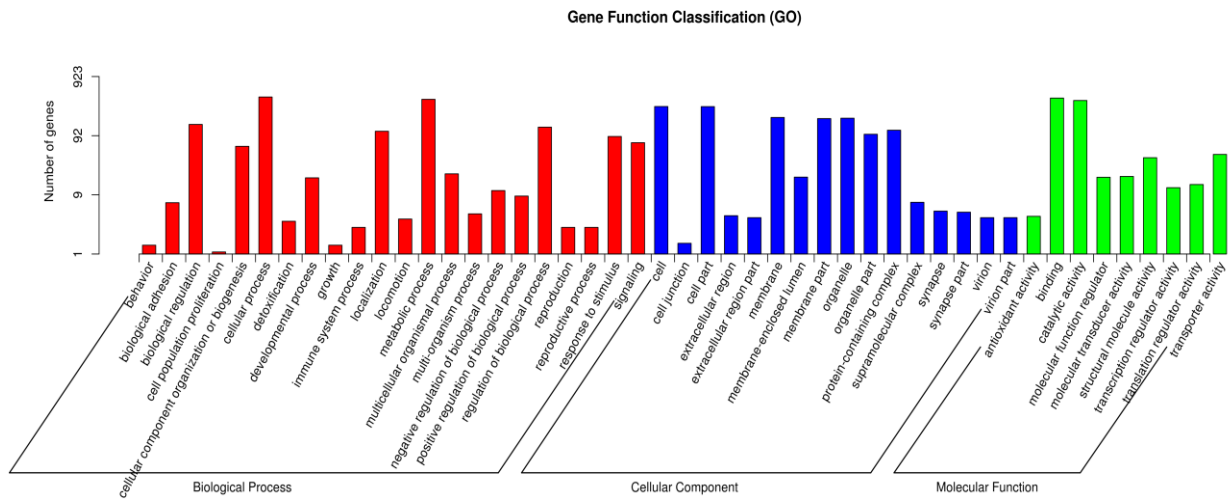

**Figure S1.** Gene ontology (GO) assignment of *D.rybakowi* unigenes. The GO classification map consists of three processes: biological process, cellular component, and molecular function.
