# Supplementary material for: Antennal Transcriptome Evaluation and Analysis for Odorant-Binding Proteins, Chemosensory Proteins, and Suitable Reference Genes in the Leaf Beetle Pest Diorhabda rybakowi Weise (Coleoptera: Chrysomelidae)
Source: MDPI journal article supplement (doi:10.3390/insects15040251), 2024-04-07
Supplement: s1 [file s1]

**Table S3. Primer used in RT-qPCR of *DrybOBPs* and *DrybCSPs***

| Gene name                       | Primer name    | Primer sequence (5'→3')   | Amplification<br>Size (bp) |
|---------------------------------|----------------|---------------------------|----------------------------|
| Odorant binding proteins (OBPs) |                |                           |                            |
| DrybOBP1                        | Forward Primer | ATGGTGAATACGAAGGACCG      | 110                        |
|                                 | Reverse Primer | CAACCCAATTTTCTTGTTGATG    |                            |
| DrybOBP2                        | Forward Primer | GTGAATTCGAAGGGCCAAATA     | 165                        |
|                                 | Reverse Primer | GCTTAAATTGCAGGGATTTTCTG   |                            |
| DrybOBP3                        | Forward Primer | CACGCTCTATGTATGAACGTAGGA  | 182                        |
|                                 | Reverse Primer | TCTGACAAACCAACAGCAGC      |                            |
| DrybOBP4                        | Forward Primer | TCCAGAACACGAACGCATAA      | 156                        |
|                                 | Reverse Primer | CCTGCTTTGACTGCCATACA      |                            |
| DrybOBP5                        | Forward Primer | GCCAATCTGATCCAGCATCGTA    | 188                        |
|                                 | Reverse Primer | ACTATTTCTGCACTCTCGAGG     |                            |
| DrybOBP6                        | Forward Primer | GCAAAACGAACAGGGTGACTAC    | 174                        |
|                                 | Reverse Primer | GAATCTATCTTCTTGGCACAATCA  |                            |
| DrybOBP7                        | Forward Primer | GGCAAAGGGCTGAATGAAAAATT   | 158                        |
|                                 | Reverse Primer | TACGTCTTATCTACGAACCTGGG   |                            |
| DrybOBP8                        | Forward Primer | CTGGCTATAAGTAACGCTAAGCC   | 192                        |
|                                 | Reverse Primer | ATCTGCCCCGATGTATCC        |                            |
| DrybOBP9                        | Forward Primer | GGTTTGATGTATCCCTCTGGAGA   | 126                        |
|                                 | Reverse Primer | GGAAATAGAAGAAGGTCGAGCAC   |                            |
| DrybOBP10                       | Forward Primer | TGATGTGATGGAACTATGAAGG    | 106                        |
|                                 | Reverse Primer | GCAATTATCGAGGGCTGCTA      |                            |
| DrybOBP11                       | Forward Primer | TGACCGATATCAAAAATGCTACGA  | 170                        |
|                                 | Reverse Primer | TGCAGGTGGACCTTCTGTAA      |                            |
| Chemosensory proteins (CSPs)    |                |                           |                            |
| DrybCSP1                        | Forward Primer | TCAGGGAAGCGTTGGAAAC       | 141                        |
|                                 | Reverse Primer | GGAGTGGTCTGGATCGAAAAC     |                            |
| DrybCSP2                        | Forward Primer | TTCTACCGGACGCATTGAAAAC    | 149                        |
|                                 | Reverse Primer | CAGATAAACGTGGTCGGAATCG    |                            |
| DrybCSP3                        | Forward Primer | ATTGATTGTGGTAGCAGCAGTG    | 189                        |
|                                 | Reverse Primer | CCGTCTTTCCAGCTTTCTTTCA    |                            |
| DrybCSP4                        | Forward Primer | GGCGTTGGTATCTTGTAGTTTAGC  | 151                        |
|                                 | Reverse Primer | TCCCGTCCTTCTGGTGAAC       |                            |
| DrybCSP5                        | Forward Primer | CTACGACTCTAAGACCTTCCATCTC | 159                        |
|                                 | Reverse Primer | TTCTAATTTGTTGTTGCTCCTG    |                            |
| DrybCSP6                        | Forward Primer | CCAGATGCCATACGAACTAATTG   | 226                        |
|                                 | Reverse Primer | CGTCAGATTCTTCACCACCAT     |                            |
