# Supplementary material for: Antennal Transcriptome Evaluation and Analysis for Odorant-Binding Proteins, Chemosensory Proteins, and Suitable Reference Genes in the Leaf Beetle Pest Diorhabda rybakowi Weise (Coleoptera: Chrysomelidae)
Source: MDPI journal article supplement (doi:10.3390/insects15040251), 2024-04-07
Supplement: s1 [file s1]

**Table S1. Assembly summary of antennal transcriptome in *D. rybakowi***

| Clusters | Sample name | Raw reads  | Clean reads | Error rate (%) | Q20 (%) | Q30 (%) | Unigene |       |        |
|----------|-------------|------------|-------------|----------------|---------|---------|---------|-------|--------|
|          |             |            |             |                |         |         | Total   | N50   | Median |
| Male     | ANM_1       | 53,816,214 | 51,667,180  | 0.03           | 97.60   | 93.02   | 51,124  | 2,148 | 591    |
|          | ANM_2       | 55,433,876 | 53,204,984  | 0.03           | 97.39   | 92.53   |         |       |        |
|          | ANM_3       | 38,744,988 | 38,134,492  | 0.02           | 98.18   | 94.26   |         |       |        |
| Female   | ANF_1       | 51,985,680 | 49,939,080  | 0.03           | 97.19   | 92.10   | 51,124  | 2,148 | 591    |
|          | ANF_2       | 55,560,910 | 53,360,574  | 0.03           | 97.35   | 92.46   |         |       |        |
|          | ANF_3       | 40,729,506 | 40,136,438  | 0.02           | 98.26   | 94.48   |         |       |        |
