# Supplementary material for: Antennal Transcriptome Evaluation and Analysis for Odorant-Binding Proteins, Chemosensory Proteins, and Suitable Reference Genes in the Leaf Beetle Pest Diorhabda rybakowi Weise (Coleoptera: Chrysomelidae)
Source: MDPI journal article supplement (doi:10.3390/insects15040251), 2024-04-07
Supplement: s1 [file s1]

Gene sequence of reference genes in *D. rybakowi*

>OR797776 Actin, complete cds[Diorhabda rybakowi]

ATGTGTGACGACGATGTAGCGGCTTGTGCTTGACAATGGTTCCGGTATGTGCAAAGCTGGTTTTGCCGGA  
GATGACGCTCCACGTGCCGTCTCCCATCGATCGTGGTCGCCAAGACATCAGGGAGTCATGGTTGGTATG  
GGACAAAAAGACTCATACGTAGGAGATGAAGCTCAAAGCAAAGAGGTATCCTTACTTTGAAATACCCAATT  
GAACACGGTATCATCACCAACTGGGATGATATGGAAAAGATCTGGCATCACACTTTCTACAATGAACTCCGTG  
TCGCTCCAGAAGAACACCCAGTCCTTCTTACTGAAGCTCCACTTAACCCAAAAGCCAACAGAGAAAAGATG  
ACACAAATTATGTTTGAAACCTTCAACACCCAGCTATGTATGTAGCCATCCAAGCCGTACTTTCATTGTACGC  
TTCTGGTCGTACCACTGGTATTGTATTGGACTCTGGAGATGGTGTCACCACACCGTACCAATCTACGAAGGT  
TACGCTCTTCCCATGCTATCCTCCGTTTGGATTGGCTGGTCTGACTTGACTGACTACCTCATGAAAATCCT  
TACCGAAAGAGTTTACTCATTACCACTACAGCTGAAAGAGAAATTGTTCTGTGACATCAAAGAAAACTTTG  
CTATGTTGCCCTCGACTTCGAACAAGAAATGGCCACCGCTGCTGCTTCTACTTCCCTCGAAAAGAGCTACGA  
ATTGCCTGATGGACAAAGTCATCACCATTGGTAACGAAAGATTCCGTTGCTCCTGAAGCCCTCTTCAACCTTCC  
TTCTTGGGTATGGAATCTTGTGGTATTACGAAACCGTCTACAACCTCCATCATGAAGTGTGACGTAGATATCC  
GTAAGGACTTGACGCCAACACTGTTCTTCCGGAGGTACCACCATGTACCCAGGTATTGCTGACCGTATGCA  
AAAGGAAATCACCGCTCTTGCTCCATCTACCATCAAGATCAAGATCATCGCTCCCCAGAAAGGAAATACTCC  
GTATGGATCGGTGGATCTATCTGGCTTCCCTCTCCACTTCCAACAGATGTGGATCTCAAACAAGAATACG  
ACGAATCCGGCCCTGGAATTGTTACCGCAAGTGCTTCTAA

>Actin

MCDDDDVAALVVDNGSGMCKAGFAGDDAPRAVFPISIVGRPRHQVGMVGMGQKDSYVGDEAQSKRGILTLY  
PIEHGIITNWDDMEKIWHHTFYNELRVAPEEHPVLLTEAPLNPKANREKMTQIMFETFNPAMYVAIQAVLSLY  
ASGRRTGIVLDSGDGVTHTVPIYEGYALPHAILRLDLAGRDLTDYLMKILTERGYSFTTTAEREIVRDIKEKLCYVAL  
DFEQEMATAAASSTLEKSYELPDGQVITIGNERFRCPEALFQPSFLGMESCIHETVYNSIMKCDVDIRKDLANT  
VLSGGTTMYPGIADRMQKEITALAPSTIKIKIIPPERKYSVWIGGSILASLSTFQQMWISKQEYDESGPGIVHRK  
CF

>OR797777 GAPDH glyceraldehyde-3-phosphate dehydrogenase, complete cds [Diorhabda rybakowi]

ATGGTGAAAGTAGGAATAAACGGTTTTGGACGTATTGGTCGTTTGGTGCTTCGCGCTGCCCTTTCCAAAGGC  
GTAGAAGTAGTAGCCGTTAACGATCCGTTCTCGATGTGCGATTACATGGTCTACTTATTCAAATTCGATTCAAC  
CCACGGTCGTTACAAGGGATGCGTCAACAGCGATGGTAAAAATTTGGTAGTTGATGGTAAACCGATTGCTGT  
ATACCAAGAAAAAGATCCCGCCCAAATTCATGGGGTAAACACGGTGCCGACTATGTAGTAGAATCTACCGG  
TGTTTTACCACAGTCGAAAAGGCAAAGAAACATCTGGACGGTGCGCTAAGAAAGTTATCATCTCAGCTC  
CATCTGCTGACGCTCCTATGTACGTTTGCGGCGTCAATCTCGATTCTTACAACCCAGCTGATCCCGTCATTTCC  
AACGCTTCTGTACCACGAACTGCTTGGCTCCATTGGCTAAAGTCATTTCATGATAATTCGAAATTGTGGAAG  
GTTTGATGACAACGGTACATGCCACTACTGCCACGCAGAAGACCGTCGACGGTCCGTCCGGTAAATTGTGG  
CGAGACGGTCGTGGTGCCGGACAAAACATCATTCCAGCCTCTACTGGAGCTGCCAAGGCAGTCGGCAAAG  
TTATCCCAAGTCTTAATGGTAAGTTGACAGGTATGGCGTTCCGCGTACCAGTCCCTAACGTTTCAGTCGTCGA  
TTTGACCGTACGTTTGGGCAAATCAGCGACTTACGACGAAATCAAAGCTAAAGTTAAGGAAGCCGCCGAAG  
GTCCCCTAAAGGGCATCTTGGGTACACCGACGAAGAAGTCGTTTCCAACGATTTCATCGGCGATACTCACT  
CATCAGTATTCGATGCCAAAGCCGGTATCCAACCTCAACGATAAATTCGTTAAACTCATCTCTTGGTACGATAAC  
GAATTCGGTTATTCTTCAAGGGTTATCGATTGATCTTATTCATCTCTAATAAAGCTTAA

>GAPDH

MVKVGINGFGRIGRLVLRAALSKGVEVVAVNDPFLDVDYMVYLFKFDSTHGRYKGCVNSDGKNLVVDGKPIAV  
YQEKDPAQIPWGKHGADYVVVESTGVFTTVEKAKKHLDDGGAKKVIISAPSADAPMYVCGVNLDSYNPADPVISN

ASCTTNCLAPLAKVIHDNFEIVEGLMTTVHATTATQKTVDGPSGKLWRDGRGAGQNIIPASTGAAKAVGKVIP  
LNGKLTGMAFRVPVNPVSVVDLTVRLGKSATYDEIKAKVKEAAEGLKILGYTDEEVVSNDFIGDTHSSVFDAK  
AGIQLNDKFVKLISWYDNEFGYSSRVIDLILFISNKA

>OR797778 EF1a elongation factor1 alpha, complete cds[Diorhabda rybakowi]

ATGGGGAAAGAAAAGATTCATATTAACATCGTCGTCATTGGTCACGTAGATTCTGGTAAATCTACCACCACTG  
GACATTTGATTACAAATGCGGTGGTATCGACAAACGTACTATCGAAAAATTCGAAAAAGAAGCCCAAGAAA  
TGGGAAAAGGTTCCCTTCAAGTATGCATGGGTACTCGATAAACTTAAGGCTGAACGTGAACGTGGTATCACTA  
TTGATATTGCTTTGTGGAAATTGAAACATCTAAGTACTATGTAACCATCATTGATGCTCCAGGGCACAGAGAT  
TTCATTAACCAATGATTACTGGAACCTCACAAGCTGATTGTGCAGTACTATTGTAGCTGCAGGTACTGGTG  
AATTCGAAGCTGGTATTTCCAAGAACGGACAAACACGTGAACATGCACTTCTTGCATTACCCTTGGAGTGAA  
AACAACTTATTGTTGGTGTCAACAAAATGGACTCTACTGAACCACCATACAGTGAATCACGTTTTGAAGAAAT  
CAAAAAAGAAGTTTCTCTTATATTAAGAAGATTGGTTACAACCCTGCTGCTGTAGCCTTTGTACCAATTTCA  
GGATGGCACGGAGATAATATGTTAGAACAATCCGACAAAATGCCATGGTTCAAGGGATGGAATATTGAACGT  
AAAGAAGGAAAGGCTGATGGTAAATGTTTGATTGATGCTTTAGATGCCATCCTCCCTCAAGTCGTCCAACA  
GAAAAACCTCTTCGTCTTCCACTCCAGGATGTCTACAAAATTGGAGGTATTGGAACAGTACCCGTTGGTTCGT  
GTTGAAACTGGTGTGTTTGAACCAAGGTATGGTGGTAGTTTTTGCCCCAGCAAACCTTGACCACTGAAGTAAAA  
TCTGTTGAAATGCACCACGAAGCCCTTCAAGAAGCTGTACCTGGAGACAACGTTGGTTTTAACGTTAAGAA  
CGTCTCTGTCAAAGAATTACGTCGTGGTTATGTAGCTGGAGACACCAAGAACAATCCACCAAAGGAGCATC  
AGACTTTACCGCTCAAGTTATTGTACTGAACCATCCCGGTCAAATCTCCAACGGTTACACTCCTGTCTCGATT  
GTCACACTGCCACATTGCCTGTAAATTAATGAAATCAAAGAAAAAGTCGACCGTCGTTCTGGAAAGACAA  
CTGAAGAAAACCCCAAGCCATCAAATCTGGTGATGCTGCCATTGTCAACTTAGTTCCAAGCAAACCAATGT  
GTGTAGAATCATTCCAAGAATTCCACCTCTGGACGTTTCGCTGTTTCGTGACATGAGGCAAACAGTCGCCG  
TAGGAGTCATCAAGAGTGTAAGCTTCAAAGACCCCGGTGCAGGAAAAGTTACAAAAGCAGCAGAAAAAGC  
ACAAAAGAAGAAATAA

>EF1a

MGKEKIHINIVVIGHVDSGKSTTTGHLYKCGGIDKRTIEKFEKEAQEMGKGSFKYAWVLDKLKAERERGITIDIAL  
WKFETSKYVYTIIDAPGHRDFIKNMITGTSQADCAVLIVAAGTGEFEAGISKNGQTREHALLAFTLGVKQLIVGV  
NKMDSTEPPEYSESRFEEIKKEVSSYIKKIGYNPAAVAFVPISGWHGDNMLEQSDKMPWFKGWNIERKEGKADG  
KCLIDALDAILPPSRPTEKPLRLPLQDVYKIGGIGTVPVGRVETGVLPKPMVVVFAPANLTTEVKSVMHHEALQ  
EAVPGDNVGFNVKNSVKELRRGYVAGDTKNNPPKGASDFTAQVIVLNHPGQISNGYTPVLDCHTAHIACKFN  
EIKEKVDRRSGKTTEENPKAIKSGDAAIVNLVPSKPMCVESFQEFPLGRFAVRDMRQTVAVGVKSVSFKDPGA  
GKVTKAAEKAQKKK

>OR797779 Tub beta1-tubulin, complete cds[Diorhabda rybakowi]

ATGAGGGAAATTGTTTCATATCCAAGCCGGTCAATGCGGTAACCAAATTGGAGCCAAATCTGGGAAATCATC  
TCCGATGAACATGGTATCGACCCCACTGGAGCCTACCACGGAGACTCCGACCTCCAACCTCGAAAGAATCAAC  
GTTTATTACAATGAAGCGTCTGGAGGAAAATACGTACCAAGGGCAATCCTCGTCGATTGGAACCCGGTACC  
ATGGATTTCGGTACGATCCGGTCCTTTCGGTCAAATATTCCGACCAGATAATTTTCGTATTGGTCAATCAGGTGC  
AGGTAACAACTGGGCAAAAGGACATTACACAGAAGGTGCTGAATTAGTCGATTAGTATTGGATGTTGTCA  
GAAAAGAAGCCGAATCGTGTGATTGTTTACAAGGATTCCAACCTACACATTCTCTGGAGGTGGTACCGGAT  
CAGGTATGGGTACCCTCCTTATTTCAAAATTCGTGAAGAATATCCCGACAGGATAATGAACACATATTAGTA  
GTCCCCTACCAAAAAGTATCAGACACTGTAGTAGAACCTTACAATGCGACACTTCCGTTTCATCAATTAGTAG  
AAAACACAGACGAACTTATTGTATAGACAATGAAGCTCTCTACGATATTGCTTCAGGACTTTGAAACTCAC  
GACACCAACATACGGTGACTTGAATCATTTAGTATCACTCACAATGTCAGGAGTAACTACCTGTCTTAGATTCC  
CTGGTCAATTGAATGCAGATCTTAGGAAATTAGCCGTAAATATGGTACCATTCCACGTCTCCACTTCTTCATG

CCCGGTTTCGCTCCTCTTACATCCAGAGGTAGCCAACAATACAGGGCTTTGACGGTTCAGAACTCACTCAA  
CAAATGTTTGATGCCAAGAACATGATGGCCGCTTGCGATCCCAGACACGGAAGGTATCTTACCGTAGCCGCC  
GTATTCAGAGGTAGGATGTCGATGAAAGAAGTCGACGAACAGATGCTCAACATTCAAAACAAGAACAGCAG  
CTACTTCGTCGAATGGATTCCGAACAACGTTAAGACTGCCGTTTGTGACATTCTCTAGAGGTCTTAAGATG  
TCTGCCACTTTCATCGGTAACCTCACCGCCATTCAAGAATTGTTCAAACGTATCTCAGAACAGTTCACCGCTAT  
GTTCAGGAGGAAAAGCTTTCTTGCAATTGGTACACCGGAGAAGGTATGGATGAAATGGAATCACTGAAGCTG  
AATCTAACATGAACGATTGTTGATCTGAATACCAACAATACCAAGAAGCCACCGCAGACGAAGACGCTGAAT  
TCGATGAAGACCAAGAAGCCGAAGTTGATGAAAAC

>Tub

MREIVHIQAGQCGNQIGAKFWEIISDEHGIDPTGAYHGDSDLQLERINVYYNEASGGKYVPRAILVDLEPGTMD  
SVRSGPFGQIFRPDNFVFGQSGAGNNWAKGHYTEGAELVDSVLDVVRKEAESCDLQGFQLTHSLGGGTGSG  
MGTLISKIREEYPDRIMNTYSVVPSPKVS DTVVEPYNATLSVHQLVENTDETICIDNEALYDICFRTLKLTPTYG  
DLNHLVSLTMSGVTTCLRFPQQLNADLRKLAVNMVFPRLHFFMPGFAPLTSRGSQQYRALTVPELTQQMFDA  
KNMMAACDPRHGRYLTVAAVFRGRMSMKEVDEQMLNIQNKNSYFVEWIPNNVKTAVCDIPRGLKMSAT  
FIGNSTAIQELFKRISEQFTAMFRRKAFLHWYTGEGMDEMEFTEAESNMNDLVSEYQQYQEATADEDAEFDED  
QEA EVDEN

>OR797780 RPL13a ribosomal protein L13a, complete cds[Diorhabda rybakowi]

ATGACGGGTTTTAGTGAAAAATCCATCCTTATCGATGGCAGAGGCCACTTATGGGACGATTAGCTGCAATC  
GTTTCAAAAACCTTATTACAAGGTAACAAAGTGGTAGTAGTACGATGTGAACAATTGAACATCTCTGGAAC  
TTTTACAGAAATAAGTTGAAGTTTATGTCTTTCCTTCGTAAAAGATGTAACGTTAATCCAGCTCGTGGTCCGTT  
CCATTTTAGAGCTCCCTCCAGAATCTTCTGGAAGACAGTTAGAGGAATGTTGCCACACAAAACCTGAAAGAG  
GAAAGCAAGCTCTTCGTAGATTAAAGGCATACGAAGGAATACCTCCTCATATGATCGTAGGAAACGTGTTG  
TTGTACCTGGAGCTCTTAGAGTGATTGTCTTAAACCTGGACGTAAATTCTGTACGTTGGCCGTCTGTCA  
TGAAGTCGGATGGAAGTATCAATCAGTCGTAAGGACATTAGAAAACAAACGTAAAGTTAAGGCCGTCTTGA  
CTATTCGTAAACGTGACAAACTCAAGAACTCACTAAAAAAGCTTCAGAAAAGGTTATCAACAAACGAAA  
CCTTTCACAGAACTCATCAATTCATACGGTTATAAT

>RPL13a

MTGFSEKSILIDGRHLLGRLAIVSKTLLQGNKVVVRCEQLNISGNFYRNKLKFMFLRKRCNVNPARGPFHF  
RAPSRIFWKTVRGMPLPHKTERGKQALRRLKAYEGIPPPYDRRKRVVVPALRVICLKPGRKFCVHGRLSHEVG  
WKYQSVVRTLENKRKVKAVLTIRKRDKLKLTKKASEKVIKQTKPFTELINSYGYN

>OR797781 RPS18 ribosomal protein S18, complete cds[Diorhabda rybakowi]

ATGTCTTTGGTAATACCAGAGAAGTTCCAACACATTCTTCGTATCCTTGGTACGAATATCGATGGTAAAAGAA  
AAGTACAATTCGCCCTTACAGCTATTAAGGGAGTTGGTAGACGTTACGCTAATATTGTCCTTAAAAAAGCCGA  
TGTAACCTTGACAAACGTGCGGGAGAATGTTCCGACGAAGAAGTTGAAAAAATCATAACATCATGTCTAA  
TCCTCGCCAGTACAAAATCCCCGACTGGTTTTTGAACAGACAGAAAGATATTATTGACGGTAAATACAGCCA  
GGTAAGTCCTTCTAATCTTTAAGAAAAAAGTTCATCATCTTTAAATTGGGCTGATTCATAA

>RPS18

MSLVIPEKFQHILRILGTNIDGKRKVQFALTAIKGVGRRYANIVLKKADVNLDKRAGECSDEEVEKIITIMSNPRQY  
KIPDWFLNRQKDIIDGKYSQVSPSNSLRKSSSSLNWADS

>OR797782 RPL19 ribosomal protein L19, complete cds[Diorhabda rybakowi]

ATGAGTTCGTAAAACTTCAAAGAGGCTAGCAGCCTCTGTTATGCGATGTGGAAGAAAAAAGTTTGGTT  
AGATCCCAATGAAATAAACGAAATTGCAACACCAACTCAAGACAGAACATTTCGCAAATTGATTAAGGACG  
GTCTTATCATTAATAAACCGGTAGCAGTACATTCTCGTGCTAGAGTACGTAAGAACTGAAGCTCGCAGGA  
AAGGAAGGCATTGTGGATTGGTAAAAGGAAAGGTACAGCCAATGCTCGTACTCTCAAAGGAATTATGG

ATACAACGTATGAGAGTCTTACGTCGTTTATTGAAAAAGTACCGTGAAGCTAAGAAAATTGACAGACATCTTT  
ACCATTCACTTTACATGAAAGCCAAGGGTAACGTATTCAAGAATAAGCGTGTCTTATGGAATACATTCATAA  
AAAGAAGGCAGAGAAAGCACGTGCCAAGATGTTGGCAGACCAGGCTAATGCCAGAAGATTGAAGGTGAA  
ACAAGCTAGGGAAAGACGCGAAGAACGTATAGCTACTAAAAAGCAGGAGGTATTGCAAAATTACCAGAGA  
GAAGATGAAGCTGCTGCTGCTAAGAAATAA

>RPL19

MSSLKLQKRLAASVMRCGRKKVWLDPNINEIANTNSRQNIKKLIKDGLIKKPVAVHSRVRKNTARRKGR  
HCGFGKRKGTANARTPQKELWIQRMVLRLLKKYREAKKIDRHLYHSLYMKAKGNVFNKRVLMMEYIHKKKA  
EKARAKMLADQANARRLKVKQARERREERIATKKQEVNQNYQREDEAAAAKK

>OR797783 SYN6 Syntaxin-6, complete cds[Diorhabda rybakowi]

ATGAAAGAAAGAATCAATATGAATCGGAGTAGGGATAAAGATCGTACTGCGAGGCAGCCTTTGCTGGATAAT  
AGTCCCGTTAGAGTTACAAATTCACATGCAACAACAAAATATTTTAAATTGGAGAATGATCTAGATAGTCCTC  
AACGACAATTTTGAGTGATACTCTTAACCAACAACAATATTTAACAAGACAACAAGAAGAACATTTGGAGG  
CTATTAGTGATTCTTTAGGTTCTTTGAAAACAGTTTCTAGACACATTGGAGTTGAATTGGACGAACAAGCTG  
GAATGCTGGATGAATTTGGGACCGAATTAGAAAATACTGATTCCAAATTGGATTCCACAATGAAAAAGGTTG  
CCAAAGTACTACGACTTTCTAATGATCGGAGGCAGTGGACCGTTATAATAATTTTAGTTGTAATCTTGTGATT  
GTGATATTTTATTTTATACTGTGA

>SYN6

MKERINMNRSRDKDRTARQPLDNSPVRVTNSHATTKYFKLENDLSDPQRQFLSDTLNQYQLTRQQEEHLE  
AISDSLGLSKTVSRHIGVELDEQAGMLDEFGTELENTDSKLDSTMKKVAKVLRLSNDRRQWTVIIILVVILVIVFLF  
FIL

>OR797784 GST glutathioneS-transferase1, complete cds[Diorhabda rybakowi]

ATGGGACCGACTTTATATCATTTCCACCGAGTGGACCCTCTAGAGGAGCCTATCTAGCTGCAAAAGCTGTAG  
GAGTTAATGTTGATTTGCAGATCGTAGATTATTCAAAAAGGAACAGTACAGTGAAGAATTTATCAAGATTAA  
CCCTCAACATACTGTGCCTACGTTAGTTGATGGAGACTTTACTATTTGGGATGGTCATGCTATAGCGGGATATT  
TAGCAACAGTTTATGCAAAGGATGAAAATTTGTATCCGAAAGATCCACAACGTAAAGCTCTTGATAGTCAAA  
GGCTTTATTTGATTGTGGTACTCTATATCCACGTATTAGGCAAATTTGTTATCCGATTTTATATATGGGAGAAG  
ACCAAATCTATGATGAATATAAATTGCCTTTGGAAGAAGCTTTGGGATTCTTAGATGTTTTCTAGAAGGAAA  
TGATTTGTAACAGGCAAATATCTAACAATTGCCGATTGTTTCATTAGTGGCATCAGTTTCAAGCATAGTGGCT  
GTAGGTTGGGATATAAATGCATATTCTAATGTTGTTAATTGGATATCAAGATGTGCTTTGGCAATACCAGACTA  
TGAGGAGGTTAATCAAAAAGGAGCAAATATGTATGGTAAAGCAGTCAGAAGTAACTTGCTCCGGGACAAC  
TCTAG

>GST

MGPTLYHFPPSGPSRGAYLAAKAVGVNVDLQIVDLFKKEQYSEEFIKINPQHTVPTLVDGDFTIWDGHAIAGYLA  
TVYAKDENLYPKDPQRKALVDQRLYFDCGTLPRIRQICYPILYMGEDQIYDEYKLPLEEALGFLDVFLEGNDFT  
GKYLTADCSLVASVSSIVAVGWDINAYSNVVNWISRCALIPDYEEVNQKGANMYGKAVRSKLAPGQL

>OR797785 RPS15 ribosomal protein S15, complete cds[Diorhabda rybakowi]

ATGGCCGACAAAGTCGAAGAGCAAGTTAAAAAGAAGAGAACTTTCAAAAAATTCACCTCCGTGGTGTAGA  
TTTGGACCAGTTATTGGACATGCCAAACGAACAATTAATGGAATTGATGCATTGTCGTGCTAGAAGGCGTTTT  
ACTAGAGGCTTAAACGCAAACCAATGGCTTTGGTTAAAAAATTGCGTAAAGCCAAGAAAGAAGCTCCTCC  
ACTAGAAAAGCCAGAAATTGTTAAAACTCATTTACGTAACATGATCATCGTTCCAGAAATGGTTGGTTCTATT  
GTAGGTGTTTACAATGGCAAAGCCTTCACACAGGTTGAAATCAAACCTGAAATGATTGGACATTATCTTGGT  
GAATTCTCTTTAACATACAAGCCTGTAAACACGGTAGGCCAGGTATTGGTGCTACCCACAGTTCTAGATTTA  
TTCCTCTCAAAATAA

>[RPS15](#)

MADKVEEQVKKKRTFKKFTFRGVLDQLDMPNEQLMELMHCRARRRFTRLKRPKPMALVKKLRKAKKEAP  
PLEKPEIVKTHLRNMIIVPEMVGSIVGVYNGKAFTQVEIKPEMIGHYLGEFSLTYKPVKHGRPGIGATHSSRFIPLK

| The Ct values for candidate reference gene of <i>D. rybakowi</i> under tissue conditions |       |    |              |               |              |            |             |            |              |              |             |            |
|------------------------------------------------------------------------------------------|-------|----|--------------|---------------|--------------|------------|-------------|------------|--------------|--------------|-------------|------------|
| Sex                                                                                      | Group |    | <i>RPS18</i> | <i>PRL13a</i> | <i>RPL19</i> | <i>ACT</i> | <i>SYN6</i> | <i>TUB</i> | <i>GADPH</i> | <i>RPS15</i> | <i>EF1a</i> | <i>GST</i> |
| Male                                                                                     | CT1   | He | 24.36        | 23.69         | 24.93        | 20.66      | 31.51       | 25.83      | 26.80        | 26.04        | 25.62       | 28.58      |
|                                                                                          |       |    | 24.54        | 23.63         | 25.19        | 21.32      | 33.31       | 26.64      | 25.77        | 26.58        | 26.77       | 27.72      |
|                                                                                          | CT2   |    | 21.34        | 20.37         | 21.79        | 23.29      | 29.87       | 25.99      | 25.59        | 21.96        | 21.47       | 21.66      |
|                                                                                          |       |    | 21.28        | 19.72         | 21.44        | 23.69      | 31.16       | 27.02      | 21.50        | 22.02        | 22.95       | 23.30      |
|                                                                                          | CT3   |    | 20.01        | 19.38         | 20.62        | 16.53      | 22.53       | 19.73      | 21.61        | 22.07        | 17.75       | 24.63      |
|                                                                                          |       |    | 20.01        | 19.00         | 19.62        | 13.39      | 23.92       | 19.54      | 20.87        | 21.70        | 18.31       | 26.03      |
|                                                                                          | CT1   | Th | 24.73        | 25.91         | 26.68        | 25.54      | 31.84       | 28.09      | 25.99        | 25.58        | 26.20       | 27.80      |
|                                                                                          |       |    | 25.67        | 24.18         | 26.39        | 22.81      | 32.63       | 26.53      | 26.47        | 26.03        | 27.51       | 28.69      |
|                                                                                          | CT2   |    | 21.87        | 19.91         | 23.99        | 27.25      | 35.18       | 28.78      | 24.58        | 22.82        | 28.15       | 23.33      |
|                                                                                          |       |    | 23.47        | 20.77         | 24.05        | 27.80      | 34.08       | 25.28      | 26.43        | 22.79        | 27.85       | 25.18      |
|                                                                                          | CT3   |    | 20.21        | 17.42         | 18.78        | 23.18      | 26.47       | 21.34      | 22.74        | 21.03        | 22.82       | 22.99      |
|                                                                                          |       |    | 19.89        | 18.14         | 18.50        | 23.36      | 26.76       | 22.61      | 22.91        | 21.40        | 23.00       | 23.08      |
|                                                                                          | CT1   | Ab | 23.40        | 23.77         | 25.16        | 23.88      | 33.89       | 25.02      | 26.37        | 25.06        | 25.93       | 27.86      |
|                                                                                          |       |    | 24.26        | 23.76         | 24.71        | 24.07      | 33.40       | 26.96      | 27.57        | 25.25        | 26.65       | 28.35      |
|                                                                                          | CT2   |    | 24.94        | 21.29         | 24.18        | 28.07      | 32.48       | 29.23      | 28.61        | 23.15        | 26.41       | 23.66      |
|                                                                                          |       |    | 22.73        | 21.39         | 24.50        | 27.15      | 32.25       | 29.96      | 28.44        | 23.20        | 28.04       | 24.60      |
|                                                                                          | CT3   |    | 22.22        | 21.35         | 21.66        | 23.29      | 29.88       | 25.65      | 27.81        | 23.03        | 27.33       | 23.90      |
|                                                                                          |       |    | 23.12        | 21.09         | 22.53        | 22.81      | 30.69       | 27.46      | 26.73        | 23.24        | 28.11       | 24.71      |
|                                                                                          | CT1   | Le | 25.49        | 25.77         | 27.02        | 22.96      | 33.86       | 27.65      | 26.95        | 27.62        | 26.49       | 30.31      |
|                                                                                          |       |    | 26.43        | 25.03         | 27.74        | 22.73      | 33.04       | 28.35      | 27.29        | 27.54        | 27.81       | 30.58      |
|                                                                                          | CT2   |    | 21.91        | 21.14         | 22.71        | 21.61      | 31.63       | 28.12      | 25.99        | 24.73        | 23.49       | 25.20      |
|                                                                                          |       |    | 22.10        | 20.86         | 22.94        | 22.10      | 33.40       | 27.28      | 24.71        | 23.79        | 25.17       | 24.19      |
|                                                                                          | CT3   |    | 20.98        | 20.03         | 21.92        | 18.30      | 26.98       | 21.68      | 22.44        | 22.49        | 21.79       | 25.17      |
|                                                                                          |       |    | 21.23        | 19.70         | 22.26        | 18.13      | 27.03       | 21.81      | 23.40        | 23.04        | 22.36       | 25.58      |
|                                                                                          | CT1   | Wi | 23.88        | 23.03         | 24.65        | 26.21      | 32.74       | 24.82      | 26.73        | 25.20        | 23.90       | 27.97      |
|                                                                                          |       |    | 23.06        | 22.54         | 23.71        | 25.71      | 32.02       | 24.75      | 26.66        | 25.68        | 24.12       | 27.61      |
|                                                                                          | CT2   |    | 20.91        | 18.80         | 19.40        | 23.96      | 28.19       | 22.60      | 23.66        | 20.92        | 20.48       | 22.66      |
|                                                                                          |       |    | 20.82        | 18.12         | 19.26        | 23.67      | 28.24       | 23.00      | 23.52        | 20.84        | 21.72       | 22.97      |
|                                                                                          | CT3   |    | 21.74        | 21.87         | 23.17        | 24.08      | 29.16       | 23.29      | 26.33        | 23.13        | 21.45       | 27.12      |
|                                                                                          |       |    | 22.40        | 22.39         | 24.00        | 23.60      | 28.54       | 23.53      | 27.61        | 22.93        | 22.10       | 28.24      |
| Female                                                                                   | CT1   | He | 21.87        | 20.58         | 20.80        | 22.77      | 30.61       | 25.07      | 24.47        | 22.89        | 24.61       | 25.85      |
|                                                                                          |       |    | 22.19        | 20.56         | 19.99        | 21.38      | 30.94       | 25.20      | 24.32        | 23.16        | 24.86       | 25.93      |
|                                                                                          | CT2   |    | 23.25        | 21.26         | 21.83        | 25.22      | 31.03       | 28.46      | 26.45        | 25.11        | 28.46       | 23.86      |
|                                                                                          |       |    | 22.86        | 21.22         | 22.23        | 24.93      | 31.54       | 27.38      | 26.25        | 24.59        | 28.05       | 24.41      |
|                                                                                          | CT3   |    | 22.38        | 21.19         | 21.47        | 24.17      | 31.72       | 25.30      | 25.64        | 23.30        | 25.47       | 25.30      |
|                                                                                          |       |    | 22.02        | 21.02         | 21.63        | 24.04      | 30.17       | 25.52      | 25.65        | 23.80        | 25.12       | 25.71      |
|                                                                                          | CT1   | Th | 20.53        | 20.02         | 20.90        | 23.39      | 30.69       | 26.42      | 26.09        | 22.58        | 26.35       | 24.76      |
|                                                                                          |       |    | 20.65        | 19.86         | 20.69        | 23.04      | 30.52       | 26.83      | 25.86        | 22.85        | 27.25       | 23.11      |
|                                                                                          | CT2   |    | 21.84        | 20.03         | 21.31        | 23.80      | 29.95       | 26.65      | 25.43        | 23.28        | 27.21       | 21.87      |
|                                                                                          |       |    | 22.10        | 20.14         | 20.58        | 23.91      | 29.89       | 26.47      | 26.91        | 21.40        | 27.40       | 22.76      |
|                                                                                          | CT3   |    | 23.54        | 22.43         | 21.58        | 24.26      | 31.94       | 28.52      | 26.40        | 23.74        | 28.24       | 25.14      |
|                                                                                          |       |    | 22.72        | 21.94         | 21.43        | 24.34      | 33.12       | 28.37      | 25.52        | 24.46        | 28.33       | 25.66      |
|                                                                                          | CT1   | Ab | 22.11        | 21.57         | 22.36        | 26.56      | 31.58       | 27.01      | 26.31        | 23.79        | 28.04       | 24.66      |
|                                                                                          |       |    | 22.75        | 20.53         | 22.67        | 26.32      | 31.79       | 27.31      | 27.28        | 24.32        | 28.35       | 24.94      |
|                                                                                          | CT2   |    | 21.46        | 18.62         | 20.65        | 29.07      | 27.92       | 25.55      | 28.45        | 23.99        | 25.00       | 22.13      |
|                                                                                          |       |    | 21.13        | 19.15         | 21.07        | 28.72      | 29.44       | 25.59      | 28.09        | 23.53        | 25.25       | 22.31      |
|                                                                                          | CT3   |    | 21.70        | 19.86         | 22.16        | 26.46      | 29.88       | 24.74      | 28.48        | 22.15        | 22.85       | 24.07      |
|                                                                                          |       |    | 21.37        | 20.63         | 22.23        | 26.77      | 30.38       | 24.47      | 28.55        | 22.37        | 22.85       | 23.93      |
|                                                                                          | CT1   | Le | 21.24        | 20.64         | 21.86        | 20.50      | 31.77       | 27.46      | 27.08        | 22.64        | 24.00       | 24.16      |
|                                                                                          |       |    | 21.59        | 21.19         | 21.88        | 20.47      | 35.17       | 27.27      | 26.59        | 28.00        | 23.65       | 24.36      |
|                                                                                          | CT2   |    | 19.66        | 20.39         | 21.24        | 16.96      | 26.34       | 21.54      | 22.22        | 21.90        | 21.95       | 21.99      |
|                                                                                          |       |    | 19.12        | 19.83         | 20.40        | 16.79      | 26.83       | 21.11      | 22.17        | 20.61        | 22.49       | 21.84      |
|                                                                                          | CT3   |    | 21.95        | 19.26         | 20.53        | 15.61      | 26.18       | 20.52      | 23.26        | 22.09        | 18.25       | 24.52      |
|                                                                                          |       |    | 19.69        | 19.75         | 19.89        | 15.45      | 26.21       | 20.15      | 20.71        | 21.62        | 19.11       | 25.17      |
|                                                                                          | CT1   | Wi | 21.63        | 21.01         | 22.17        | 27.23      | 31.21       | 25.81      | 26.09        | 23.10        | 21.79       | 25.82      |
|                                                                                          |       |    | 22.18        | 21.07         | 22.39        | 27.27      | 31.95       | 26.07      | 26.46        | 23.83        | 23.42       | 26.10      |
|                                                                                          | CT2   |    | 18.78        | 18.83         | 20.97        | 23.23      | 27.49       | 22.05      | 25.24        | 20.14        | 18.61       | 25.38      |
|                                                                                          |       |    | 20.67        | 19.56         | 21.64        | 23.49      | 27.57       | 21.46      | 25.16        | 20.81        | 19.87       | 24.84      |
|                                                                                          | CT3   |    | 19.33        | 20.10         | 19.86        | 22.81      | 26.04       | 20.57      | 22.07        | 21.63        | 16.92       | 25.62      |
|                                                                                          |       |    | 20.15        | 18.26         | 20.17        | 22.88      | 25.38       | 19.77      | 26.27        | 21.50        | 18.61       | 25.47      |

| The Ct values for candidate reference gene of <i>D. rybakowi</i> under sex conditions |       |    |              |               |              |            |             |            |              |              |             |            |
|---------------------------------------------------------------------------------------|-------|----|--------------|---------------|--------------|------------|-------------|------------|--------------|--------------|-------------|------------|
| Sex                                                                                   | Group |    | <i>RPS18</i> | <i>PRL13a</i> | <i>RPL19</i> | <i>ACT</i> | <i>SYN6</i> | <i>TUB</i> | <i>GADPH</i> | <i>RPS15</i> | <i>EF1a</i> | <i>GST</i> |
| Male                                                                                  | CT1   | AD | 24.59        | 24.26         | 26.18        | 23.92      | 34.82       | 26.52      | 26.26        | 26.24        | 26.15       | 24.36      |
|                                                                                       |       |    | 24.52        | 25.29         | 26.05        | 24.28      | 34.02       | 26.45      | 26.74        | 26.03        | 25.43       | 28.01      |
|                                                                                       | CT2   |    | 21.65        | 20.62         | 22.49        | 23.62      | 32.22       | 26.82      | 25.46        | 22.68        | 24.89       | 23.33      |
|                                                                                       |       |    | 21.41        | 20.99         | 21.65        | 23.15      | 31.57       | 26.78      | 26.85        | 22.82        | 24.00       | 24.54      |
|                                                                                       | CT3   |    | 19.16        | 18.18         | 19.18        | 16.73      | 24.39       | 17.58      | 19.73        | 19.92        | 17.36       | 24.31      |
|                                                                                       |       |    | 18.62        | 18.37         | 18.78        | 16.75      | 24.36       | 19.27      | 20.82        | 20.33        | 17.47       | 24.69      |
| Female                                                                                | CT1   | AD | 22.41        | 20.39         | 22.09        | 23.87      | 32.29       | 26.67      | 26.66        | 24.41        | 27.00       | 24.29      |
|                                                                                       |       |    | 22.80        | 20.28         | 21.78        | 23.41      | 32.61       | 26.27      | 24.82        | 21.72        | 27.08       | 23.72      |
|                                                                                       | CT2   |    | 20.40        | 17.37         | 20.18        | 18.70      | 26.82       | 18.96      | 20.96        | 20.53        | 17.90       | 25.84      |
|                                                                                       |       |    | 20.78        | 18.03         | 20.90        | 18.48      | 24.02       | 19.05      | 23.63        | 20.32        | 15.61       | 23.35      |
|                                                                                       | CT3   |    | 16.43        | 16.82         | 18.19        | 17.80      | 22.68       | 17.81      | 22.84        | 20.68        | 17.65       | 21.64      |
|                                                                                       |       |    | 17.50        | 16.72         | 17.77        | 18.06      | 22.13       | 17.26      | 23.82        | 20.93        | 17.19       | 22.09      |
