# Supplementary material for: Antennal Transcriptome Evaluation and Analysis for Odorant-Binding Proteins, Chemosensory Proteins, and Suitable Reference Genes in the Leaf Beetle Pest Diorhabda rybakowi Weise (Coleoptera: Chrysomelidae)
Source: MDPI journal article supplement (doi:10.3390/insects15040251), 2024-04-07
Supplement: s1 [file s1]

### Phylogenetic tree of DrybOBPs

>OR797799 DrybOBP1 odorant binding protein 1, complete cds [Diorhabda rybakowi Weise]

ATGAAGACTGTTCTAGTAATTACTCTGTTGATTGCCGTAACCTGGCTGGTCAACGTAAAGATGAAATACAAG  
CAGCTGTCAAAGCCTGTGATGGTGAATACGAAGGACCGAATGATTTAAGAAAATTAGTTATGGAAAAAGAT  
GCTGACAAAGTCAAATTGGGCGAAAAAATATTTTGCATCAACAAGAAAATTGGGTTGCAAAAAGAAAATGG  
GGATATCGATGAAGAAGTATTCATAAAAGATTTCGGAGCATATCAAAGATGACATTTTCAAAGAGAAAAGTGAA  
AGTATGTATGAAACGAGATGGGGTCACTCCAGAAGAAGCTGCTTTTAACTACTTGAAATGTGTTCAATCTACT  
TTACAATCAGTTCATGCATAG

> DrybOBP1

MKTVLVITLLIAVTLAGQRKDEIQAAVKACDGEYEGPNDLRKLVMKEDADKVKLGEKIFCINKKIGLQKENGDIID  
EEVFIKDSEHIKDDIFKEKVKVCMKRDGVTPEEAAFNYLKCVQSTLQSVHA

>OR797786 DrybOBP2 odorant binding protein 2, complete cds [Diorhabda rybakowi Weise]

ATGAAGGTTGTTTTCTATTTTCTCTGGTTATTTCCATATCTTTGGCAAATCCATAGAAGAGATAAAAAGAATT  
GAAAGCGGCTTACAAAGAATGCGGTGGTGAATTCGAAGGGCCAAATAGTGTGAAAGCACAAGTTTTAAAA  
GAAAATGTGGACAAAGTTAAATTGGGCGAAACTATTTTTTGTATCAATAAGAAGATAGGTTTGCAAATGAT  
AATGGAACATCGATGAACAAATTTTCAGAAAATCCCTGCAATTTAAGCTTTCAGACGAATCTTTGATTAAACA  
AAGTAGCCAAAGAATGTTCTAAACGTGAAGGTGATACTAATGAAGTTATAGCTTTAATTTTTTGAAATGTTAT  
CAATTTATGATTAAGAATAATTTGAACTAG

>DrybOBP2

MKVVFIFSLVISLANSIEIEIKELKAAYKECGGEFEGPNSVKAQVLKENVDKVKLGETIFCINKKIGLQNDNGNIDE  
QIFRKSQFKLSDESINKVAKECSKREGDTNEVIAFNFLKCYQFMIKNNLN

>OR797787 DrybOBP3 odorant binding protein 3, complete cds [Diorhabda rybakowi Weise]

ATGCACCTCTCCGTATTGCTTTATTTTGTGTTTCGCTGTGGTATCAGCCGAAATAAGTAACGAACCAGAAGA  
ATCCTTCAAGAAAATACATGACCAATGCCAATTAGACCCGCTTACAAGTAAATGAAGCTATTTTCGATAAA  
ATAAGACATGGTGAGAAAGTCACCGATCCCAAATTGGCAAAACACGCTCTATGTATGAACGTAGGACTTGGA  
GTTCAAAACCAAAATGGAGACATCAACGTAGATAAACTCAGAGAATCTATTGAGAAATTTACTGATAACAAA  
GAAAAAGTTGACGAAGTTGTTAATAAATGTGGCACCAGAACTTCTACGAACGCTGAAGAAGCTGCTGTTGG  
TTTGTGAGATTGTATCATGAGCTTCAGACCTCCCTCACCTCAAGGCGAACATCATGGTCATCATCACTAG

>DrybOBP3

MHFSVFALFFVFAVVSAEISNEPEESFKKIHDQCQLDPASQVNEAIFDKIRHGEKVTDPKLAKHALCMNVGLGV  
QNQNGDINVDKLRRESIEKFTDNKEKVDEVVNKCGTRTSTNAEEAAVGLSDCIMSFRPPSPQGEHHGHHH

>OR797800 DrybOBP4 odorant binding protein 4, complete cds [Diorhabda rybakowi Weise]

ATGAAGATTGTACTCGTATTTTGTGTGCTCTTGTTTCTGTTTGGCACGTGGTTTGCCAAACCTTCAGAAC  
ACGAACGCATAAACTAGCTGAAGTCCACCGGTCTTGTCATCCAATCCAAAACATTCTGCGACGAAAACA  
AATTGAAGAATCTTTTCAATAACATCAATGACCCTCAAGTCGGCACTCACATGCTGTGTATGGCAGTCAAAGC  
AGGATTGATGAGACCAAATGGGGATTTCGATATTTCTATTTGAAGCAGAAAGTTAGTTTGGTAGTACGCGA  
TCATTCTAAAGCAGAGGAACTTGTTTCAAGAGTGTACTCGTAAAGGAGAAAACCCAGGAAAAACTGCCAATT  
TGATGTGGAAATGTTTGGTTGAAAATGATGTTTCAGTATTATCATCAGTTGTAA

>DrybOBP4

MKIVLVFLCALVSVLARGLPNLPEHERIKLAEVHRSCQSNPKTFCDENKLNLFNNINDPQVGTHMLCMAVKA  
GLMRPNGDFDISYLKQKVSLVVRDHSKAEELVQKCTRKGENPGKTANLMWKCLVENDVQYYHQL

>OR797788 DrybOBP5 odorant binding protein 5, complete cds [Diorhabda rybakowi Weise]

ATGAAAATCGCAACAGTGATATGGTCTTCGCAATTTTGAATGGTATCAGCAGTAGCACCACTGGCCGAT  
TCAAAGTAGCATGATAAATGCCAATCTGATCCAGCATCGTACGTCGATGAATCGATTCTAGAGAAAGTAAG

ACGTGGCGAAAAAGTTACTGATCCCAATCTGGCGAAACATACTCTTTGTATGAACGTGAAAACTGGTGTTCAGAGCCAAAATGGAGACATAATCGTGAAAAATCTCAAAAAATTCCTCGAGAGTGCAGGAAATAGTAAAGAGAAAGTGGACGAAGCTATCAGCAAATGTGGTACCAGGGCTCCGCTAACGCAGATGAAGCTGCCGTAGCTTTGACAAACTGTGTTATAAAATTTAGACCAGAACGCCCTCATCATCAT

>DrybOBP5

MKIATVIWFFAIFAMVSAVAPPGRFKVAHDKCQSDPASVDESILEKVRRGEKVTDPNLAKHTLCMNVKTGVO SQNGDIIVENLKKFLESAGNSKEKVDEAISKCGTRASANADEAAVALTNCVIKFRPERPHHH

>OR797789 DrybOBP6 odorant binding protein 6, complete cds [Diorhabda rybakowi Weise]

ATGAAAATCGCAACAGTGATATGGTTCTTCGCAATTTTGGCAATGGTTGTGCTGATGATTACATATTATTCTACTCAAAAACAATTCGCAAGTTCTATACAATGCAACATATTATGAAAGATATTAATCTAATAAAAGCTAAAACTGACACACCATCCAATGTAGATCAATTAGCAAGCAGATTACTGTGTATGAATCAAAAGCTTGGAATGCAAAACGACACAGGGTGACTACGTTCCAGCGGAAATCAGAAATTATTTGAACATGTAGTTGTCAACAAAGATAACATTGAAAAATTGTGAATCACTGTTCACTGTTAAATCTGATGGAACACAGCTAAAGAAGCTGCTCTGAATTTATTGATTGTGCCAAGAAGATAGATTCTTTACGATTATCCTCT

>DrybOBP6

MKIATVIWFFAIFAMVCADDYILFYKQFASSIQCNIFMKDINLIKAKTDTPSNVDQLASRLLCMNQKLGMQNE QGDYVPAEIRNYFEHVVVNKNIEKIVNHCSVKSDGTTAKEAALNLFDCAKKIDSLRLSS

>OR797790 DrybOBP7 odorant binding protein 7, complete cds [Diorhabda rybakowi Weise]

ATGAACAAACTATTTCTATTCGCAGTACTCTGCATCGGTGTTGCCAACAGCGAATTGGCTGAATCGGAGTATGTACCGAACTGCTTAAGTTGGCAAAAAGAGACTCACGATAAGTGTATTGAGCAAACCTGGTGTGACACAAGCGCAATGAATGAAGTGAACAAAGGTAAATTTGATGATGATGAAAAAATGAAGGAATACATCACCTGTCTGTGGGTACAGGGCAAAGGGCTGAATGAAAAATTTGAGCTCAATACGGAATTAATAAGAAATGTGTTACCAGAGAAATCAAGACGTGGAATTGAAAGTTATGATGGAGTGCCATGACGAAATACAAGCAAAAGCTGGAGCCGATCCAGGTTCTAGATAAGACGTACTCACTCGCCAAATGTGTCTACAATAAGAAGCCAGAGGTGAGTAATTTTGAGTCTTCATTCATTTGCGCAACAAAGCCTTCACTACCATTTTTCTTTCAACGCCAATATAATTATTAAAT

>DrybOBP7

MNKLFLFAVLCIGVANSELAESEYGTLLKLAKETHDKCIEQTVTQAAMNEVKQKGFDDDEKMKEYITCLWVQ GKGLNEKFELNTELIRNVLPKIKDVELKVMMECHDEIQAKAGADPRFVDKTYSLAKCVYNKKPEVSNFGVFIHF ANKAFTTIFSFNANIIK

>OR797791 DrybOBP8 odorant binding protein 8, complete cds [Diorhabda rybakowi Weise]

ATGATGTGTCTAAGAATAGTATTGTGTGTTTGTCTGGCTATAAGTAACGCTAAGCCTATTTGCGATGACTTACAAAAGATGCAAAAGAGTCACGAAGAATGTATAAAAGAAGTTGGAATAGAAAAAGTCGATTTGGATAAAGTTT TAGAATCGAATTTGCTGAAAGAACGTTGGAAAAATACTCTTATTGCTACGGTAAAAAATTCGGATACATCGGGCAGATAATAAAATCGATAGAATTATTGCTAAAGACCAATTCGAAAAATCATCCCTGGAACATCTGAGGAATTATGAAAGTGTGCATACCCGAAGGAGAGGTAAGTAAAAAGTAGCCTTGGAATACAACGGTGTATCGGTCAAAAAACTAAAGAGTTATCAAAACAAT

>DrybOBP8

MMCLRIVLCVCLAISNAKPISDDLQKMQKSHEECIKVGVLDKVLNLPERTLEKYSYCYGKKFGYIGADN KIDRIIAKDQFEKIIPGTSEEFMKVCIPEGEVTEKVALGIQRCIGQKTKELSKQ

>OR797792 DrybOBP9 odorant binding protein 9, complete cds [Diorhabda rybakowi Weise]

ATGAAAGAAGTTTTCTGATTTCTATGTCTAGTATCGTGATTTGGGGTATGCGGTTGCCACCATCAGAGATAAAGAATTGAACAAAGTTCATCACGAATGTTTGATTAAACTAAATGTGATAGAAAATACGTTGCTCATCGTTATGAATACCTTGTTACGAACCTTTGAGAGAATATTTGTTATGTCTTGCAACACGTTATGGTTTGATGTATCCCTCTGGAGATTTCAACTACGAAACATTGGAATATAAATTTCTGATAATTTGCGAGAAGGGAGAAGATCCTGAATAT

TTTATAAAAAGATGTGCTCGACCTTCTTCTATTTCCGATGCTCGTCAAATAGCAGTTGACTTTTGGACGTGCTT  
AGAACAAATAAATTTTCATTATTTGAGTTTATTAATATA

>DrybOBP9

MKEVVFVFLCLVSCIWGMRLPPSEIKELNKHVHHECLIKTCDRKYVAHRYEYLGYEPLREYLLCLATRYGLMYPSPGD  
FNYETLEYKFLICEKGEDPEYFIKRCARPSSISDARQIAVDFTWCLEQINFHYLSFINI

>OR797801 DrybOBP10 odorant binding protein 10, complete cds [Diorhabda rybakowi Weise]

ATGAATCAAAGTTACTTTGTATTTATCTCTTGGTCATCATAGCAAGTATCGTACTAGAAGGAAATTGCGCTCC  
TTCGGACAACGCTAATGCTACTGTCAAAGATTTTGTATTAAGGAAACGGGTATTAGTGAAGATAAAGTGAA  
GCAATGGAAGATGAATCTGTAGAAGAATTAGACGAAGATTGTTACTGTTACCTTCATTGTATCTTCATATCTC  
TCAAGTTAATTGACGAAAAAGGTAACTTGATGTGATGGAACTATGAAGGAATTCCTGATTTAACAAAG  
AATGTTTAGAAAAAGTTCCTCATATTTGGAGTGACTGATATAGCAGCCCTCGATAATTGCGAGTCC

>DrybOBP10

MNQSYVFYLLVIIASIVLEGNCAPSDNANATVKDFCIKETGISEDVKVQMEDESVEELDEDCYCYLHCIFISLKLID  
EKGKLDVMETMKEFPDFNKECLEKVPHILECTDIAALDNCE

>OR797793 DrybOBP11 odorant binding protein 11, complete cds [Diorhabda rybakowi Weise]

ATGTTGGCCAACGATTGGAAGAACTTTACATCAATTCTCACTTCGTAAACATAAGAAATAGGAGAGATACTT  
CGAATGAAATCGAAGGCAAATGTGCGAAAAAAGGAAGCAAACCTTGTTGTGATGACACGTCTTTGAAAA  
GATACACAAAGAACAAAGAGATTACAAGGAAGCATGCTTTAAAGAGATAGTAGGAGAAGATAAGCCGGAA  
AAACGTCCACATGAAGCACCATTGATCCTTTCGACTGCGAAAAAATGCGACAAAGAAGAAAGTGAGATTGT  
GTGCATTTCTCAATGTGTGGGTCAAAGAATAACTATATTGACGATGACGGTAAGATTAAACCTGATGAATTT  
GGAGAATACATAAGAGATCTATTGGAAGATATCACGTATTTAACTCCTGTAGTAGAGAAGATAATTGAAGGAT  
GTTTGACCGATATCAAAAATGCTACGATTAAATATGATAAATGTAAACAAGATGGAATGATATCAGAATTTGT  
ATATTTAAAAATATTCAACTGAATTGTCCCGATGATCAAATGAAGAATAAAGAAGCTTGTAAGAAGTTTCAA  
AAATGTTAACAGAAGGTCCACCTGCACTACGTGGCCTACCACCACCAGGTTTGTGAGACCACCACCATCTC  
ATTTCTTGATTAG

>DrybOBP11

MLANDLEELYINSHFVNIRNRDTSNEIEGKCAKKGSKPCCDDTSLKKIHKEQRDYKEACFKEIVGEDKPEKRPHE  
APFDPFDCEKMRQRREIVCISQCVGQKNNYIDDDGKIKPDEFGEYIRDLEDITYLTPVVEKIIIEGCLTDIKNATIK  
YDKCKQDGMISEFCIFKNIQLNCPDDQMKNKEACKKFQKMLTEGPPALRGLPPPFGDGPSPSHFLD

**Phylogenetic tree of Coleopteran OBP sequences**

>AUF72964.1 AchiOBP17 odorant-binding protein 17 [Anoplophora chinensis]

MKTALVLLSVIAGTLAASLSEEEKKLQEIHDRCAQADPATYVDHELLHHLADNIDNPKVGAHMLCESKAVGLQKP  
NGELDLNVIKQKISLTVSDKAKVERLVRECAVKKQTPEKTAVNLFMCLDKDGVTFHEF

>AUF72969.1 AchiOBP22 odorant-binding protein22 [Anoplophora chinensis]

MFPSVVCVVGSYLIFLTIIQAKEISSGRCDIPPSAPKKVEEIIINQCQDEIKLAILSEALQAFNVNEHSRSRAKRATFSE  
DEKRIAGCLLQCVYRKMDAVNEKGFPVQGLVSLYTEGISQKDYILATVQAVNTCLIQSQKKYLITPQSIDENGKT  
CDIAYDVFDVCSDEIGKYCGQTP

>AUF72949.1 AchiOBP2 odorant-binding protein2 [Anoplophora chinensis]

MKTLFVFLCVAILGAVAHHLPETEMRKLKEVHDSCQANPTTHVDEKLLKKLKENVEDKKVGTHLLCMAVKVGLL  
TQDGDLIKNVIRDKIVIATHDSLKVDEVLLKCAVKRETPEKTAVQMLVCFIDNGIHYHDL

>AUF72985.1 AchiOBP38 odorant-binding protein 38 [Anoplophora chinensis]

MKTVFVFLCVIVGILAQDKPKLIAEEQMLEHIHDECQADPKTFADHDLHNLAAANIDNPQVGAHMLCESTKVG  
LQKENGELDIETIKSIGLSVADPNRVEFLVKECAVKKNTPEKTAINLFMCLDKNGVTFHEF

>AUF72972.1 AchiOBP25 odorant-binding protein 25 [Anoplophora chinensis]

MRTCAIVVCIATLVVSIHCASEEQHERVKKIHSECQADPKTHADDELLKKYHNGEEVDKSIVGAHMLCMSTKFG  
VIHEDGKINKSALKTALSRLISDETKLNEAIEKCAVEKDDEPKDTALALGRCFRQQGGTLGHEHIHNR

>[AUF72950.1 AchiOBP3 odorant-binding protein 3 \[Anoplophora chinensis\]](#)

MNNVVAFCALLVATVSAYNFEDPDFNILLSDDLEELSSGVASFHPSRRDDEAVNDKDKCHHRKRWGELCCAE  
DVVAKMRDVEKDLKRECFKEVVGDKDKHDFPNCETMDQRKKQIVCVIECVGKKKDLLDTEGNPKKEEFRSF  
LKESFSSESWLAALQDKVISTCLDEGKNATANRDASDSTSCNPAGIKIAHCLHREIQLNCPADQIKDEKSCARLQE  
RLKRRDFFHPPPPPGGFDEPDN

>[ATL75740.1 AglaOBP2 odorant-binding protein 2 \[Anoplophora glabripennis\]](#)

MKAFAVVLCAVFAVALAQLPDSERIHLKQVHDSCQADPKTYADESRLKQLNKYIDDNVVGTHMLCMSRKAGL  
QKANGDLDAVIRQKIDLVADKSKVDGLVKKCAVVDGNPKRTANLLWLFCVQNNIDYLHRL

>[XP\\_018577241.1 AglaOBP70 general odorant-binding protein 70 \[Anoplophora glabripennis\]](#)

MFPSVVCAVGSYLIFLTIIQAKEISSGRCDIPPSAPKKVEIINQCQDEIKLAILSEALQAFNVNEHSRSRAKRATFSE  
DEKRIAGCLLCQVYRKMDAVNEKGFTVQGLVSLYTEGISQKDYILATVQAVNTCLIKSQKKYLITPQSIDENGKT  
CDIAYDVDFCVSDEIGKYCGQRP

>[ALR72513.1 CbowOBP25 odorant binding protein 25 \[Colaphellus bowringi\]](#)

MYYALLPRSAVLAVIIVVAAYNFEDTEFNQILANDLEDVYSFTYSHPSRRDDKAVEEDKCHPPRRGRPLCCAE  
TMRKLHDDKKEIKRACFEITGKEKPERPDRHHGPPDFPFCEKIEQHRRDMMCIQQCVGEKLDYLDADGKPK  
PEQFEKYVEGIFEKEDYLLPLKDKIVSVCLDEAKNATEKVSSDPCKSTGLVLEHCIFINTQLNCPEDQIKDKKMSCK  
FQDRLRQGFDKRSSPSPEAEDE

>[XP\\_044748578.1 CsepOBP19d general odorant-binding protein 19d-like \[Coccinella septempunctata\]](#)

MFKFVVLTCFAVAVNAVSEELKGKFLEKMTKIGGECAKEVGANEDDIAELMAHKLPSRHEGECMIFCFHKHLG  
LMNEDGTLNKEGAMKAAEPLKADDPHELHEKVVKIGKECAEEVAADDDCKKYATKLTECVVKKGKAMGLDSSVL  
H

>[ALR72502.1 CbowOBP14 odorant binding protein 14 \[Colaphellus bowringi\]](#)

MSTTMKLAVFLFVVFSSVMEGYSAPSDSSNSTIKDYCIKEVEISEEKVNKFEKNPDDTPDEDIMCYTHCILVTLGV  
VDDDGKIIIEFTKIFDKYDMCEVKKIPKILECTDLINLNKCAATDE

>[AIX97067.1 DhelOBP21 odorant-binding protein 21 \[Dastarcus helophoroides\]](#)

MKSFAFVLALTFFVAVYGLTEEQKEKIKAYHKDCSASSGVNQDLITKARKGEFVEDPKLMEHLFCFSKKAGFQNE  
AGDIQTDVIKAKLGAIEKDSATVDQLIKCAIKKATPQKTAFDTIKCYESTPQHISLA

>[AQY18970.1 GdauOBP6 odorant-binding protein 6 \[Galeruca daurica\]](#)

MTEKQMNATKKLVRNSCTAKTKVAPDVVDAMHKGDFSNGQCYLIMNTYKLIRADGSFDWEGGIATVNAN  
APPHIAATAAASIKNCKDSMKNTSDKCLGSAEIAMCIYNDDPPNYFFP

>[AQY18965.1 GdauOBP1 odorant-binding protein 1 \[Galeruca daurica\]](#)

MYTLWMISVITMFAITVSASEFDDMRDRIMETKEYKECSQESGATYDDFMAFKNTTEVMCLFKCSLEKKGSLD  
KDGNIIDLNIKERLSGNTHLDDTKEMFLKCAESVGKIDKCDDLLEFRWCLVNITKKQ

>[AQY18986.1 GdauOBP22 odorant-binding protein 22 \[Galeruca daurica\]](#)

MYFHAFVFLFVAVISAEALSQLPGRFNKAHDKCQSDPASYVDEAILEKVRGEKVTAPNLAHTLCMNVESGVQ  
DQNGEIIVENLRKFLERAGNTKEKVDEAISKCGTRTSAIAEEAAVALTNCVIKFRPERRHNR

>[AQY18972.1 GdauOBP8 odorant-binding protein 8 \[Galeruca daurica\]](#)

MAKLLTLITIGVMCLSPSFAQKEDFIACLQESGLDISEVKNLNTKDLSCFIKCTMTKTGEIDSEGNVNMDKINLN  
LDKMKLTETIKDSLKTCFAGIEKIEKCEDAQKVTKCWSGVFNDTKWFDEQ

>[AQY18988.1 GdauOBP24 odorant-binding protein 24 \[Galeruca daurica\]](#)

MKSVIMFIIICFSFVLEIFAETRTAPNLEYQEARRKCQDDPKTTLDRETLKNAFRGDINTALFGGHAVCIYRHLGILD

EQANINKIKLRDSDYIIVDQRQLDAAVKECSVKKNTPEETAIVEIFKCTKRAMAPYLPHYEP

>[AQY18979.1 GdauOBP15 odorant-binding protein 15 \[Galeruca daurica\]](#)

MNKPIIFAVLCIGVASCFVPETEFGIKLLKLGKEAHEKCIETGVTQAAIERAKQGKFDDDDIQIKDYNNCLWTFSK  
AINKNFEINVELIKELLPKIRDVQLKAIMDCHEEIKGPILSLEKTYLLSACVFNKNPENWIYF

>[AQY18974.1 GdauOBP10 odorant-binding protein 10 \[Galeruca daurica\]](#)

MSSMKYIFLSLCLFFIYENVQTLMTKQIAATKKLIRNTCINKQGVAPKVDGMYKGEFDFSDKNSMCYVHCVLT  
TYKLIKDNFTDWEEGISVMQLNAPPSIATPVIETIKNCKNAVKTTHHKCTAALEIAKCLYDDDPVHYFLP

>[AQY18989.1 GdauOBP25 odorant-binding protein 25 \[Galeruca daurica\]](#)

MKTVFVFLCVLVAVLARGLPNLPENERIKLAEVHRSCQSNPKTFCDENKLNLFNNINDPQVGTHMLCMAVKA  
GLMRPNGDFDIPYLKQKVGLVVRDHSKVDGLIQKCTHKAENSGKTANLMWKCLVENDVQYYHQL

>[XP\\_045479958.1 HaxyOBP19d general odorant-binding protein 19d-like \[Harmonia axyridis\]](#)

MFKFLFLVACALVAVNAVSEQLKNEFIEKMTNIGGQCAKEVGANEEDIAELLAHKAPSRHEGECMIFCFHKHLG  
LMNEDGTFSKEGGLKALEPVKADDPKLYEKLISIGKMCQEVAKDDDKCKYATQLTVCGVKKGKEMGLDASMI  
H

>[QTE76124.1 HaxyOBP16 odorant binding protein 16 \[Harmonia axyridis\]](#)

MNKVVLFGVLVATALCAVAAYEFASDDFNEYLADELDDYSTMDVPIPKLRFRRDEEAVSDKCRYRRKRLCCAETSIE  
ELHEKEKEIKRECFKQVLGKEKEHRMDPFKCNIEKHKRDMICVMQCVGQKNDVLDADGDVRDAEFADFVKQ  
SFSKDPWFAEFQDTIETCIDEAKNATEIRDTEKSAKNPAGIKLAHCLFVQTQLNCPSEIKDTKSCSKLKERIKAK  
LSDGVPPPPFLHEE

>[AEA76516.1 HparOBP2 odorant-binding protein 2 \[Holotrichia parallela\]](#)

MKYFVLFALCTYVLGATLQEHQVVMQEIINAGAECAEKLGATPEDVDKLMKEQIPDNKAGLCVVACVNKKF  
GLQNDGTVNKGSTLVNIEKVKDIDEDMYKKMSSVWSTCNENTGNDSECNNTGINLLKCMKEEGGKLGLTKE  
SMGF

>[AKI84378.1 HparOBP20 OBP20 \[Holotrichia parallela\]](#)

MKFFVLLSFVAFANCMDQDFTLKATARMSQYVEECAESTGATKDDLAEVMEIRIPSSKEGKCFACVYHKKYGIQ  
DKDGKLDKEASIEAMSDLKIADPELYDKAVKLFDTICINQVPNQDCECNTAAIFMYCFNNGGMMGLKPGMVP  
M

>[AKI84360.1 HparOBP49 OBP49 \[Holotrichia parallela\]](#)

MKISLFCFALCVAIVNASIEKYIDQLTTEIATAKTECAKQVGASVDDVVEVFQKTPTSKEGKCIISCVLKLFGGQDS  
NGKINKHAAIGKIEELPIDTDVYEKFSSVWKSCEKTSDDNDGCDAAKLMICLAQEVDKHGISKKLIGL

>[ADF87391.1 HparOBP49 pheromone binding protein 1, partial \[Holotrichia parallela\]](#)

MFKNTALLILGTFLPTVLCLSEEMEALAKQLHDDCVAQTSVDGAHITTVKDQKGFDDDEKFCYLKCLMTETAIV  
GDDGVVDVEAAVGVIPDEFKDIAEPIMRKCGVIPGANPCDNVYQTHKCYEMDPKSYMIV

>[HparOBP14 OBP14 \[Holotrichia parallela\]](#)

MKFVIVLLLSALAFINAYDFEDHAYNELLVEQYSLAHPRLRRAAENNCIDSRSCCYNDVAVPQYHANETEECSKELG  
FDRSQIRGPLTDAQINQIKCLAECISKKKGHFDADGNLLKDELLKDIRKPLEQVAWLKPKVEDIFNKCLDGLPTKV  
PENQCNDIGMTIGHCIWKEIQLECPKDRQANLEKCEALQVYLKENKAFPPPPPIRC

>[XP\\_023018007.1 LdecOBP70-X2 general odorant-binding protein 70 isoform X2 \[Leptinotarsa decemlineata\]](#)

MIASELILEFLLILAVKLYNGCDIQALAAINMNEHTHSRAKRAAFTDDEKRIAGCLLQCVYRKMNAVNNGEGFPTV  
DGLVSLYTEGISQKDYILATMQAVNHCVNHAQKKHLITPQSISEHGKTCDIAYDVFDVSDDIGKYCGQTP

>[AIX97039.1 MaltOBP24 odorant-binding protein 24 \[Monochamus alternatus\]](#)

MSQVREGEKDLKRECFKEVVGKDKHEKFDPFNCETMDQRKKQISCVIQCQVGQKDLLDSEGNPKKEEFRAVVK  
ERFASWSLAAALQDKVISACLDEAKNATANHSDASASCNPAGIKIAHCLHREIQLNCPADQIKDEKSCARLQER

LKRRDFFHPPPPGAFDEPDN

>[AIX97023.1 MaltOBP8 odorant-binding protein 8 \[Monochamus alternatus\]](#)

MKILVTFVCVSIACVLVYGAPSI RDVHNECQADPATHIEDAVFKAIHDGESFDKVKVGAHMLCMATKSGIINQD  
GTINKSAVKELLAVDISDETKLVEVTNKCAEEGPTSETALKLSKCITENTKRGRHGHGHHHGHHEHHHDHSV  
H

>[AHA39267.1 MaltOBP2 odorant-binding protein 2 \[Monochamus alternatus\]](#)

MKAVLVLCVVVAGALAQLPDSERIHLKQVHDSCQADRATYADESRKQLNKYIDDAVVGNHMLCMSKKAGLQ  
KNGDLDIGVIKQKIALVTADKSKVDGLVKKCAVVNGNPQKTANLLWLCFVQNNIDYLHRL

>[AIX97019.1 MaltOBP25 odorant-binding protein 25 \[Monochamus alternatus\]](#)

MFLRVVVCVGSLLVFLVIVQAKDAPSGRCDIPPSAPKKVEDIINQCQDEIKLAILSEALQAFNVNEHTRSRAKRAT  
FSEDEKRIAGCLLQCVYRKMNAVNEKGFPTVEGLVSLYTQGISQKDYILATIQA VNTCLFKSQRKYLITPQSIDENG  
KTCDIAYDVFDVCVSDEIGKYCGQTP

>[AIX97024.1 MaltOBP9 odorant-binding protein 9 \[Monochamus alternatus\]](#)

MRTCAIVVCFATLVVSIQGLTDEEKGRITVHSECQADPKTQIDDELLKYYKGEHVDKSVIGPHMLCMATKFGT  
VNAEGKLDKSKLRQGLSRLISDETKLNEAVDKCSVDKDDAQDTALAVERCVREQAGIAGHVHHHH

>[AIX97020.1 MaltOBP5 odorant-binding protein 5 \[Monochamus alternatus\]](#)

MMKLGFI LSCVIFGALAASLSEEEKLQEIHDKCQADPATYVDHELLHHLAENIDNPKVGAHMLCESKAVGLQK  
QNGELDLNVIKQKISLTVSDKVKVERLVKECAVKKETPEKTAVNLFMCLDKDGVTFHEF

>[APC94280.1 PaenOBP26 odorant-binding protein 26 \[Pyrrhalta aenescens\]](#)

MKILALICFLGIFLSVYGDSHFLFMAKYAKYYSDCSEPALNRDDFKNAMSGKPFNAEQAAFFCLNTKFGVQ  
NEQGDYVREPLKFFKHIVVNQDNIEKIVEICSTRPGGSSAKDAALSLFNCAKKIDNLHFPFQHTIEA

>[APC94281.1 PaenOBP5 odorant-binding protein 5 \[Pyrrhalta aenescens\]](#)

MKTLALVCFSAIVLPVYADSYFSFYANYITYYMLCDNDAATSLNRDDLRLNALRDKPFNAKQLEAYLFCLNKHFGV  
QNEQGDYVPEKLKEFFKHVVVNQDNLEKIVHSCSTRPEGSSAKDAALLNCAKKFDTLNIPLNSETSE

>[APC94279.1 PaenOBP4 odorant-binding protein 4, partial \[Pyrrhalta aenescens\]](#)

RGLVQILKRLTMHFSVFLFFVFAVASAQINPEQRESFKKIHDKCQSDPATHVDDAVFDKIRRGKEVTEPNLAKHT  
LCMNVGSGIQNENG DINIEKLRTL LANGPGNKEKVDEIIGKCGTRSSTNAVEAAEALSNCLRQYRPDRPEGDHH  
DHHHDHDDHHHH

>[APC94285.1 PaenOBP29 odorant-binding protein 29 \[Pyrrhalta aenescens\]](#)

MIKFSILVTIAAICVCTSM AQKGSFVACLQESGLPEDFSKFGSPDSKEVNC FVKCMMTKMGEIDEEGNVLMDKI  
EENLANIKIPDTAKDNLRKCLSAIDKIGKCEDSKKVTECWTS LFK

>[APC94277.1 PaenOBP2 odorant-binding protein 2 \[Pyrrhalta aenescens\]](#)

MKTIFVLTCIVAVALAKNLPNLPENERVKLAQVHQSCQSDPKTYCDESKLRNLVNNIDDPVVGTHMMCMMAVK  
AGLMSKNGDFDLGTMKNKISLVINDQSKVDGLVKKCSHKTDNLGKTANLMWVCFVQNDIQYYHKL

>[APC94283.1 PaenOBP7 odorant-binding protein 7, partial \[Pyrrhalta aenescens\]](#)

RVLTLIIPNTNKFTMKITLVFSLLAVTLAGNRREEIKEAVTACGGENDGPNELGKQILKENADQAKLGAITFCVHK  
KLGIQNDHGDIDVDVIRKDLNALIKDESEVNKIVEECGRNGDTPEAAAFNFFKCYQKHVTK

>[APC94274.1 PaenOBP8 odorant-binding protein 8 \[Pyrrhalta aenescens\]](#)

MKVIVFCLMLFTFALANETKELIEGSLKSCGAIDGPNAIRTLVVQENADEKKLGAILFCANKKIGLQYADGNINL  
DVLERLIEAGNNDEETAKKYMDCGRLKGENGEEKAFNFLKCHETI

>[APC94266.1 PaenOBP23 odorant-binding protein 23 \[Pyrrhalta aenescens\]](#)

MKFVLLAVLCIGSISCFKESEHNEKFQKASKEVHRICMEETGITQEIDNVKKGNFDDDSKTKKYNNCLWTRIKV  
MNEKFELDEKLLKDLLPERIRDVQLKFIIECLEETRAAAADLESVEKTYLLTKCIYNKKPENWFYI

>[APC94265.1 PaenOBP31 odorant-binding protein 31 \[Pyrrhalta aenescens\]](#)

MKAAIILALCLAIHCLVDVEELGEEFVEKAKHLHDVCVAQTQVPNSVINLYKAGIFPVQNNLLKKYLTCLWLSEK  
GANRNLEFNDEVIKNFFPASIAAHLVPIYVGCALVKQSAPMSTPIDDKFYLISNCIYFKDPENWVFF  
>[APC94264.1 PaenOBP22 odorant-binding protein 22 \[Pyrrhalta aenescens\]](#)  
MKTALIFTLCLAAAQCIDLKELGDEFVQKTKKLHDLCVAKINVTDSIEQFKAGVYSVQNKLFKEYVACLWLESKA  
VDENLNVNEEVKNFLPPSKTVHLAPVYVACIKLVKKTVPANAPVEEKFFLISNCVYFRNPEDWIFF  
>[APC94273.1 PaenOBP10 odorant-binding protein 10, partial \[Pyrrhalta aenescens\]](#)  
PGVLQLSRIKKHLTMMSSYSIVMCVVLALSTALPSPDDSSQKRMQESHEECLKENGIEEIALSKVLEAKVSEEAL  
NYSYCYGKKYGYIGKDNKIDRDIKQVFEAMIPGSSEEFMKTICIPDGEVTKKIALEINRCIDRWKELKKN  
>[APC94276.1 PaenOBP1 odorant-binding protein 1 \[Pyrrhalta aenescens\]](#)  
MKTVFVFLCVLVAALAHGLPNLPENERIKLAQVHRSCQSNPKTFCDENKLRNLSNYINDIEVGTHMLCMAVKA  
GLMTPNGDFDIPSIKRKVALVTRDHSNVDGLVQKCTRKAKEKPGKTANLMWMCFFQNDIQYYHQL  
>[APC94282.1 PaenOBP6 odorant-binding protein 6 \[Pyrrhalta aenescens\]](#)  
MKIFFIVSLIAATLANEYIEKLETAACECGIGVGELRALEAKGEKTTIGPTLFCMNKKIGIQDSNGIVHAEGVAN  
HIRKTHAEKDESEQNKIENC DKPTGDSGADKAYNLFLCVIKNLH  
>[XP\\_031344875.1 PpyrOBPP70 general odorant-binding protein 70 \[Photinus pyralis\]](#)  
MYMLRLFSIIVLTVIGVHAKDLKCQVPIAAPKNIEKVNVQCQEEIKTALLSEAFHFLTDNQSVNSSRRKRETFTEE  
ERRIAGCLLCVYRKMKAVNSNGFPTAEGIALYTEGAQDQEYLLASHQAVSQCLVDAQKKHLPTPHSITIKGKT  
CDIAFDVDFDCVSDRIGEYCGQSL  
>[APC94202.1 PmacOBP4 odorant-binding protein 4 \[Pyrrhalta maculicollis\]](#)  
MHCFHKYLRIFVDEIRIVIKARACIIFVLVQILKRFTMHFSVFLFFVFAVASAEITPEQQAQEQFKIHKCQSDPAT  
HVDDAVFDKLRGEKVTEPNLAKHTLCMNVGSGIQSENGDINIEKLRTILERPANKAKVDEIIGKCGTRSSTNA  
EEAAEALANCVRQYRPERPEGDHHGPHDHHHHH  
>[APC94203.1 PmacOBP31 odorant-binding protein 31 \[Pyrrhalta maculicollis\]](#)  
MFCGSIIFISVCAIIVLGAESKQNTYTNKCEIPASAPRKVEEFINQCQDEIKLAILSEALQTLNANENAHSAKRAAF  
TDDEKRIAGCLLCVYRKMKAVNEHGFPTEGLVSLYTNIEQKEYIRATIESVNTCMKMAEQKYLIKPDSDEN  
GKTCDIAYDVFDICISEIGKYCGQTL  
>[APC94190.1 PmacOBP29 odorant-binding protein 29, partial \[Pyrrhalta maculicollis\]](#)  
KALLKASSAPVTSKKPEYNTHITMMSFSIVLCVVLALSSALPRDDASEKKMQESHEECLKESGIEEIDLRKVLTE  
APEEALENYSYCAKKFGFIGEDNKIDRDIKQQLAMVPGSSEEFKECIPEEEVTKKIALEITRCIDSKYKELKKD  
>[APC94189.1 PmacOBP10 odorant-binding protein 10, partial \[Pyrrhalta maculicollis\]](#)  
IKKHLATMMSYSIVMCVILALTALPSPNNSIKERMQESHEECLKENGIEEIVLSKVLEAKVSEEALENYSYCYGKK  
YGYIGKDNKIDRDIKQEFESMVPGASEEFMKTICIPDGEVTKKIALEINRCIDRWKELKKN  
>[APC94199.1 PmacOBP1 odorant-binding protein 1 \[Pyrrhalta maculicollis\]](#)  
MKTVFVFLCVLVAALAHGLPNLPENERIKLAQVHRSCQSNPKTFCDENKLRNLSNYINDIEAGTHMLCMAVKA  
GLMSPNGDFDIPSIKRKVALVTRDYSKVDGLVQKCTRKAKEKPGKTANLMWMCFFQNDIQYYHQL  
>[APC94193.1 PmacOBP5 odorant-binding protein 5 \[Pyrrhalta maculicollis\]](#)  
MKILSLICFFAVFVSVDYFVCAKYITYYIMCGNDAATSLNRDDLKNALKDKPFNAKQLEGYLFCLNKHIGVQ  
NEQGDYVPEQLKEFFKHVVVNQDNLEKIVHSCSTRPIGSSAKDAALSLNCAKKLDTLNFPLNSTLQTDISSI  
>[APC94194.1 PmacOBP6 odorant-binding protein 6, partial \[Pyrrhalta maculicollis\]](#)  
RELSDISIMKIFFIVSLIAATLANEYIEKLETAACAGLGGELRALEAKGEKTTVGSTLFCINKEIGIQDSNGIVKA  
EEVANHIRKTHQDKDVSQNKIENC DKPTGDSGVDKAYNLFLCIKLNH  
>[APC94180.1 PmacOBP23 odorant-binding protein 23 \[Pyrrhalta maculicollis\]](#)  
MKFILLAAVCIGGVSCIIESEFNEKLQKISKEAHRICVKETGITQEAIDHVKKGNFYDDLKTKKYNNCLWRNTQV  
MGENFKLDEKLLMELVPEKARDLLFKGISECFEEARAAPADLDFIEKTYLSKCIHDKSPENWFYF



>[APC94197.1 PmacOBP27 odorant-binding protein 27 \[Pyrrhalta maculicollis\]](#)

MKSLLVCLLIITLAMTDETKDLIEEALISCGAEIEGPNNIGTLVVQENADETKLGTILFCANKKIGLQHDNGEINIDV  
LENLMETGNRDEATAKKILDCGRSKGDNGAAKAFNFKCHELAVRP

>[APC94179.1 PmacOBP33 odorant-binding protein 33, partial \[Pyrrhalta maculicollis\]](#)

MKTVIIALFFVAANCAINPAEFSPKLIKLTQELHDTCKSQSNVKDEYIQAHKQGNFAVNDITIKKYIACLWSVSKA  
LDEHLVG DYDFLYSVIPPRVSSYLPLYLDCFRQVRLTVPADAPFEEKTFLINTCIYYRNP

>[APC94177.1 PmacOBP22 odorant-binding protein 22 \[Pyrrhalta maculicollis\]](#)

MKTALIFILCLAAAHCIDLKEFGDEFVQKTKKLHDLCAKINVTDSIEIQFKEGVYSVQNKLFKEYIACLWLESKAV  
DENLNVHEDVVKNFLPPSKTGHLAPAYVACIKLVKKTVPANTPVEEKFFLISNCVYFRNPEDWIFF

>[APC94187.1 PmacOBP28 odorant-binding protein 28 \[Pyrrhalta maculicollis\]](#)

MKLFISFLIVAIVCCANAELTAEQKEKVKGYHKECIDVTGANPDLVKQAREGKFADDEKLNHILCVSKKIGFQND  
AGDIQTDVLKHKLGAAALGDQAVADQLISTCAQPKANPAETAFTLKCYYEKTPTHVSFI

>[APC94196.1 PmacOBP26 odorant-binding protein 26, partial \[Pyrrhalta maculicollis\]](#)

EETPGLNNNSTSTMKTVLIISMILLAVSLAGKRREEIKEAVRSCGGDAGGSDDLKXHTDENVDQAALGAKIFCV  
NKKIGLQNDHGNIDESVFRKDLKAVVGDEAKVNEIVAECGKRKGDTPAAAAFNFLKCYEKNVPK

>[APC94195.1 PmacOBP7 odorant-binding protein 7, partial \[Pyrrhalta maculicollis\]](#)

AASNKENTSKFTMKTILVFSLLAATLAGNRREEIKEAVTACGGENDGPNELGKLILNENADQAKLGAITFCVNKK  
LGVQNDQGDLDVDVIRKDLNTFIKDESEVNKIVEECGKRKGDTSAAAAFNFFKCYQKHITK

>[APC94198.1 PmacOBP8 odorant-binding protein 8 \[Pyrrhalta maculicollis\]](#)

MKVIVFCLMLSTFALANETKELIEGSLKSCGAEIDGPNAIKRLVVQENADEKKLGAILFCANKKIGLQYADGNINL  
DVLRLIEAGNNDDEETAKKYMDCGRLKGETGEEKAFSFLKCHETI

>[XP\\_030765038.1 SoryOBP70 general odorant-binding protein 70 \[Sitophilus oryzae\]](#)

MTGMGRILIFVFFIYGCAVQDIKKCDIPATAPKKIEEVINTCQDEIKIAILSEALEVLSVNEEKARVKRSTFNPDE  
KRLAGCLLQCVYRKLDVAVNENGFPTEEGLVLTYTEGVTTQKEYVTATKQAVQTCLTQVQKLLVTPLSLEESKVCV  
AYDVFDVCVSEEVAKYCGQTP

>[QCT83274.1 SzeOBP20 odorant binding protein 20, partial \[Sitophilus zeamais\]](#)

MTGMGRILIFVFFIYGCAVQDIKKCDIPATAPKKIEEVINTCQDEIKIAILSEALEVLSVNEEKARVKRSTFNPDE  
KRLAGCLLQCVYRKLDVAVNENGFPTEEGLVALYTEGVTTQKEYVTATKQAVQTCLTQVQKLLVTPLSLEESKVCV  
AYDVFDVCVSEEVAKYCGQTP

>[QCT83286.1 SzeaOBP32 odorant binding protein 32, partial \[Sitophilus zeamais\]](#)

MNTLVALCVVVSAAVSAYDFQDVEFNQLLASDLEDGFDLSLPLNSRVRRQAATQSPNEDDKCKKRHRRP  
KACCADELDDQIHEKDKELVRSCFREVLGVDKHEHHRRGDPFSCEQAEKRRNEMTCVFQCVGQKKGVVGEDG  
KPKPEEITKLTENFATESWFEPSIEKVVSTCLKEAENATATQVKPASADVKICNPSGITLKHCFIREIQLSCPADQIK  
DQKACERFQERIKKGIDFFEP PPPPPFDGPRDE

>[SveLOBP4](#)

MHSCQNSYFVVVLFVLNLISVNCQSDQAGGPPGKHPFHAASKEDFQKCLDETGLTIDDLKSLHHDPSKEPTEK  
HLCFMKCTATSGGLISKDGTLMTDVIKQNAPPYLDLNTAICLEGVGKISTCSDMSKVFKCFKPPNRPQ

>[SveLOBP15](#)

MVTKSKMCQVYCCIALVFCATSVLAKVDESIFTDDLKKLMDNLHETCVQKTRVSEALIDKVKEADFDVDDRLK  
CYVKCVMTESGTMDESGEIDYQALMEVVPDKYKISIKKDFENC SRKADGIDDLCEKAYTILQCVQEIDPDNYYFV

>[EFA07544.1 TcasOBPC01 odorant binding protein \(subfamily minus-C\) C01 \[Tribolium castaneum\]](#)

MKTIICFVFLAGAWALTKEQIDKLEPISKECRELNGISEDITLKVRRGEAVNEPKLKNHVLCVSKKTGLASETGET  
NVEVLRTKLRKVSSENDDEVNSIIQKCVVKSTPEETAFAEIFVCLRKVKPNFSPAN



>EFA07546.1 TcasOBPC03 odorant binding protein C03 [Tribolium castaneum]

MKFLVCLLFVIVAANALTKEQKEKLDKISKECKNQSGVSQELIDKARTGELINDPKLKAQIYCVSKKAGLATEAGEI  
NMDNLKTKLKKVAANDDEVNKIIQKCVVKKPTPEETAFEVYKCLHANKPNFSVVD

>EFA12066.1 TcasOBP15 odorant binding protein 15 [Tribolium castaneum]

MNCFVIFALSLSATVFGQSLSEDEMRENARKLMTSCKDKVGASDADVEALKMHQMPESEREGFCMLECVFDSA  
KIMQDGKFSKSGMIEGFKPLIGDDKAKLESLEKLSATCESELGDGEDKCETAKRLVECVIKNGKTHGF  
EVPPPRE

>XP\_044268412.1 TmadOBP70 general odorant-binding protein 70 [Tribolium madens]

MCTKVCILILSIIVNAEESKENKCNIPPTAPKKIEDVINKCQDEIKLAILTEALEALSINEHAKSRAKRDTSFSDDEKRI  
AGCLLQCVRKMKAVNEKGFTVEGLVALYSEGVVTQKEYIIATLQAVNVCLNKAQKKHLTKPQSLEEHGKTCIDIA  
YDVFCVSRIGEYCGQTP

>EFA07430.1 TcasOBPC04 odorant binding protein (subfamily minus-C) C04 [Tribolium castaneum]

MKAFIVLVAVCAQALTDEQKEIKNYHKECSAVSGVSQDVITKARKGEFIEDPKFKEHLFCFSKKAGFQNEAG  
DFQEEVIRKKLNAELNDLDATNKLIACAVKKDSPQQTAFETIKCYENTPTHVSLA

>EFA07518.1 TcasOBPC14 odorant binding protein C14 [Tribolium castaneum]

MNIYTCLVLVIAAASQAHLTEEQKNNWRKWSNECKVLIGVSQEAINKIRNNEFDSVDDKIKKHGLCFAKKASLA  
DSSGNIINQIKIKLRVIEDDEEVDRIKTCTIRKNTPEETTFETFRCLRENSSKFVPV

>EFA07543.1 TcasOBPC05 odorant binding protein C05 [Tribolium castaneum]

MKFLVVISTVLMANIVQGLTDEQKSLEEYSKECLKESKVDSEVLKEAEKGVYLDLDPKLMNHVYCLVKKINSQKD  
KGELEVTQIKEKLMMQINDEKEVDKLIQLCLVQEKSARYSLGKCEVSS

>EFA02860.1 TcasOBP18 odorant binding protein 18 [Tribolium castaneum]

MKLFILAGILFTGVCAVDQEFVEKFLQKMEKIGEECAEETHATSDDIADLIEQRDPKTHEGKCLIFCYHKKFNTMK  
EDGSLDKVGSVLALVEVRDADFELYKNILTFVTGDKAKIYDDPCETATALTMCGRDEAKALGLQDAIFG

>EFA02861.1 TcasOBP17 odorant binding protein 17 [Tribolium castaneum]

MKSTWFFLLACSLTCALDQEFVDEFLEKMQEFGAQCAEETDATSDDIAELIARKLPPSTHEGKCMIFCMQKKF  
NMMKENGIDRAGAIAALKPLQKADPELHQVKLIFVTGCMRVKPSDPDCDTATELALCGKKEAEAIGLEDALL  
T

>AXO78390.1 XquaOBP12 odorant binding protein 12 [Xylotrechus quadripes]

MKSVIVFLCAIVGILAQNRILVEEQMLHHIHDACQANPATYADHDLHLSANLDNPQVGAHMLCESKGVGLQ  
KENGQLDPDTIRDKISLTIGDAAQVDRLVKECAIPKNTPEKTAIHLFMCLDRNGVTYFHEF

>AXO78393.1 XquaOBP15 odorant binding protein 15 [Xylotrechus quadripes]

MKPVLVFLCAIVVGITGQNRRIVEEQNLHHIHDACQADPATNADHELLHNLAAANIDNPQVGAHMLCESKGVGL  
QKPNGELDPETIRSKLTVFIDDPKVDKLIKECAIQKNTPEKTAIYLFMCMDKEGVTYFHEF

>AXO78394.1 XquaOBP16 odorant binding protein 16 [Xylotrechus quadripes]

MKGLVFIVCVTISVTLASGLTEEQKEKVKIVHKECQDDPATHADENKLSDSYKGVEVTGLGAHFLCMSKKLGMQ  
KDNGNVDDREAIRKLSDVITVPEKLQEAVDKCAVQKATPEDTAEHVLCFHDYAGHVLHAHDHHH
