# Supplementary material for: Antennal Transcriptome Evaluation and Analysis for Odorant-Binding Proteins, Chemosensory Proteins, and Suitable Reference Genes in the Leaf Beetle Pest Diorhabda rybakowi Weise (Coleoptera: Chrysomelidae)
Source: MDPI journal article supplement (doi:10.3390/insects15040251), 2024-04-07
Supplement: s1 [file s1]

|           |           |                                                                                                                                                                                                                                                                        |     |    |    |     |
|-----------|-----------|------------------------------------------------------------------------------------------------------------------------------------------------------------------------------------------------------------------------------------------------------------------------|-----|----|----|-----|
| Minus-C   | DryboBP1  | ....MKTVLVITLLIAVTLAGQRK.....DEIQA <sup>A</sup> VKACDGE.....YEGPNDLRKLVMKEDAD...KVKLGK <sup>E</sup> IFCINKKIGLQKENGDI <sup>E</sup> EE                                                                                                                                  | C1  | C2 | C3 | 77  |
|           | DryboBP2  | ....MKVVFIFSLVISISLANSIE.....E.IKELKAAYKECGGE.....FEGPNSVKAQVLKENVD...KVKLG <sup>E</sup> ETIFCINKKIGLQNDNGNIDE <sup>E</sup> Q                                                                                                                                          |     |    |    | 79  |
|           | DryboBP3  | ....MHFS.VFALFFFEAVVSAEISN.....EP.EESFKIH <sup>D</sup> QCQLD.....FASQVNEAIFDKIRHGEKVTDPKIAKHALCMNVGLGVQ <sup>N</sup> QNGDINVD                                                                                                                                          |     |    |    | 84  |
|           | DryboBP4  | ....MKIVLVFLCALVSVIARGLPNLPE.....HE.RIKLAEVHRS <sup>C</sup> QSN.....PKTFCDENKLNLFNN...INDPQVGTHMLCMAVKAGLMRPN <sup>G</sup> DFDIS                                                                                                                                       |     |    |    | 85  |
|           | DryboBP5  | ....MKIATVIWFFAIFAMVSAVA.....P.PGRFKVAHDK <sup>C</sup> QSD.....FASYVDESILEKVRERGEKVTDPNIAKHTLCMN <sup>V</sup> KTGVQSQNGDI <sup>E</sup> VE                                                                                                                              |     |    |    | 82  |
|           | DryboBP6  | ....MKIATVIWFFAIFAMVCADD.....YILFYSKQFASSI <sup>C</sup> QCNIF.....MKDINLIKAKTDT <sup>P</sup> PSNV...DQIASRLLCMNQKLGMCNEQGDYVFA                                                                                                                                         |     |    |    | 81  |
|           | DryboBP7  | ....MNKFLFLFAVLCIGVANSEIAESEYG.....TELLKLAKETHDK <sup>E</sup> IEQ.....TGVTC <sup>A</sup> AMNEVKQ <sup>G</sup> GKFD...DDEKMKEYITCLWVQ <sup>G</sup> KGKLN <sup>E</sup> KFELNTE                                                                                           |     |    |    | 87  |
|           | DryboBP8  | ....MMCLRIVLCVCLAISNAKPIS.....DD.LQMKQ <sup>S</sup> SHEECIKE.....VGIEKVDLDKVL <sup>E</sup> SNLP...BRTLEKYSYCYGKKFGYIGADNKIDRI                                                                                                                                          |     |    |    | 81  |
|           | DryboBP9  | ....MKEVFVFLCLVSCIWGMRLPPS.....E.IKELNKVHHE <sup>C</sup> LKIK.....TKCDRKVVAHRYEYL <sup>G</sup> ...YEPLREYLLCIATRYGLMYP <sup>S</sup> GDFNYE                                                                                                                             |     |    |    | 80  |
| Classic   | DryboBP10 | ....MNQSYFVFYLLVIIASIVLEGN.C.....APSDNANATVK <sup>D</sup> FIKE.....TGISEDKVKQMEDESVEELDED <sup>C</sup> YCYLHCIFISLKLIDEK <sup>G</sup> KLDVM                                                                                                                            | C1  | C2 | C3 | 86  |
| Plus-C    | DryboBP11 | MIANDLEELYINSHFVNIRNRDTSNEIEGKCAKKGSKPCDDTSLKKIHKEQ <sup>R</sup> DYKEAC <sup>F</sup> KEIVGE...DKPEKRPHEAPFPDFDCEKMRQRRSEIV <sup>C</sup> ISQ <sup>V</sup> GVQKNYIDDDGKIKPD                                                                                              |     |    |    | 117 |
| Consensus |           |                                                                                                                                                                                                                                                                        |     |    |    |     |
|           |           | C4                                                                                                                                                                                                                                                                     | C5  | C6 |    |     |
|           | DryboBP1  | ...VFIKDSEHIKD...DIFKEKVKV <sup>C</sup> CMKRDG...VTPEEA <sup>A</sup> FN <sup>Y</sup> LK <sup>C</sup> VQSTLQSVHA.....                                                                                                                                                   |     |    |    | 126 |
|           | DryboBP2  | ...IFRKS <sup>L</sup> QFKLSDES <sup>L</sup> INKVAK <sup>E</sup> CSKREG...DTNEVIAFN <sup>L</sup> K <sup>C</sup> YQFMIKNNLN.....                                                                                                                                         |     |    |    | 130 |
|           | DryboBP3  | ...KLRESIEKFTDNKEKVDEVVN <sup>K</sup> CGTRTS...TNAEEA <sup>A</sup> VGLSDCIMSFRPPSPQGEHHGHHH.....                                                                                                                                                                       |     |    |    | 143 |
|           | DryboBP4  | ...YLKQK <sup>V</sup> SLVVRDHSKAEELVQ <sup>K</sup> CTRKEG...NPGKTIANL <sup>M</sup> WK <sup>C</sup> L <sup>V</sup> ENDVQYYHQL.....                                                                                                                                      |     |    |    | 137 |
|           | DryboBP5  | ...NLKKFLESAGNSK <sup>E</sup> KVDEAISKCGTPAS...ANADEAA <sup>A</sup> VALTNCV <sup>I</sup> KFRPERP...HHH.....                                                                                                                                                            |     |    |    | 135 |
|           | DryboBP6  | ...EIRNYFEHVVVNKEKIVNHC <sup>S</sup> VKSD...GTTAKEAALN <sup>L</sup> FDCAK <sup>I</sup> DSLRLSS.....                                                                                                                                                                    |     |    |    | 134 |
|           | DryboBP7  | ...LIRNVLP <sup>E</sup> KIKDVELK.VMMECH <sup>D</sup> EI <sup>C</sup> AKAGADPRFVDK <sup>T</sup> YSLAKCV <sup>N</sup> KKPEVSNFGVFIHFANKAFTTIFSNANI <sup>I</sup> IK.....                                                                                                  |     |    |    | 167 |
|           | DryboBP8  | ...IAKDQFEKIIPG...TSEEFMKV <sup>C</sup> IP <sup>E</sup> GE...VTEKVALGIQ <sup>R</sup> CI <sup>G</sup> QKT <sup>E</sup> LSKQ.....                                                                                                                                        |     |    |    | 130 |
|           | DryboBP9  | ...TLEYKFLIICEKGEDPEYFIK <sup>R</sup> CARPS...ISDARQIAVD <sup>F</sup> WTCL <sup>E</sup> QINFHYLSFINI.....                                                                                                                                                              |     |    |    | 136 |
|           | DryboBP10 | E...TMKEFP.....DFNKE <sup>C</sup> LEKVP...HILE <sup>C</sup> TDIAALDN <sup>C</sup> ES.....                                                                                                                                                                              |     |    |    | 120 |
|           | DryboBP11 | EFGEYIRD <sup>L</sup> LEDITYLTPVVEK <sup>I</sup> IEG <sup>C</sup> LT <sup>D</sup> IKNATIKYD <sup>K</sup> CKQDGMISE <sup>F</sup> CFIKNIQLN <sup>C</sup> PD <sup>D</sup> QMK <sup>N</sup> KEA <sup>C</sup> KK <sup>F</sup> QKMLTEGPFALRGLPPPGDGP <sup>P</sup> SHFLD..... |     |    |    | 220 |
| Consensus |           |                                                                                                                                                                                                                                                                        |     |    |    |     |
|           |           | C4                                                                                                                                                                                                                                                                     | C4a | C5 | C6 | C6a |
