# Supplementary material for: Antennal Transcriptome Evaluation and Analysis for Odorant-Binding Proteins, Chemosensory Proteins, and Suitable Reference Genes in the Leaf Beetle Pest Diorhabda rybakowi Weise (Coleoptera: Chrysomelidae)
Source: MDPI journal article supplement (doi:10.3390/insects15040251), 2024-04-07
Supplement: s1 [file s1]

|           |                                                                                                                           |             |
|-----------|---------------------------------------------------------------------------------------------------------------------------|-------------|
| DrybCSP1  | ...MFES..LIVCVLVIVVVSEARPEI..TYTTYDNIDIDEIHNDFLLRSYVDCIIGT..KPCSKDGEELKKVFREALETFCSKCSEFPQFEASFKIGKYLIENTKRSWFDELVEVFIPD  | 111         |
| DrybCSP2  | ...MFLAI.VVVCVSLVIVAVSAAPSIE.KYTSKYDNVNIDDIKSDPILLRNYIDCIGT..KKCTKDGEELKRVLPDALKTKCAKCIDTQFEGAFKILRELLKNNKQWFDELEAYYISD   | 113         |
| DrybCSP3  | ..MNEWCIEVVLMVLIVVAAVHCAPKEYDENLKIKKIDIDQVINNDFIIRNYVDCVLGK..KRCINEGNALKESWKGDLKCCDNCIEEDFRKVKILKHIYTFHRDIYDELAHLLKD      | 116         |
| DrybCSP4  | ...MGLIRIFVL.....LAIVSCSIAQTYNTRYDNIDIDRIIASKFLLDNYIQCIILEENVKRCSPGEGFEKKYIPEAIQTNCARCSDSQFRIVKKTAKHIITNRPQIWEKIFQKFIPO   | 110         |
| DrybCSP5  | MQIFQFGVIFLIHIVSIITVAAAVTEKSTTIRPSISDEAIEASIKDKFYLRQLKCAIGE..APCLAVGFRLLKSIAPLVLQGSCSQCIIPQECQQIFKVLAYMQVNFPEWNNKIIRQYSG. | 117         |
| DrybCSP6  | ..MVELICILVAGISGLVDSAFVSDQNQCYYTTYKYDHVDIEMIKNRFLIFYTACMLNK..GPCSEPEGIEFKKIIPDAIRTNCKRCIDKQFVTTVRAIQGLMKEYEKIWEQLFTEWIPD  | 116         |
| Consensus |                                                                                                                           |             |
|           |                                                                                                                           | C1 C2 C3 C4 |
| DrybCSP1  | ESKLELYRENKAEGLI.....                                                                                                     | 129         |
| DrybCSP2  | EVYLFSEYEFELKEEGIEV.....                                                                                                  | 131         |
| DrybCSP3  | GKYREKYQAQIDEILKDCTL.....                                                                                                 | 136         |
| DrybCSP4  | GTYHCSENN.FLNSE.....                                                                                                      | 124         |
| DrybCSP5  | .....                                                                                                                     | 117         |
| DrybCSP6  | LIYVFKLETHGNVPNPNIILNRFDGGEESIDTSIESSSITSTFSPYNTPPVIFSGIVFTLNPETIPIANAIGQSIKATIIYGISQFCHTFKVSILVLLHQITSTVTEASVKFFIR       | 231         |
| Consensus |                                                                                                                           |             |

Figure S3. Sequences alignment of CSPs in *D. rybakowi*. The location information of conserved cysteine of different types of OBP is identified by red colors.
