# Supplementary material for: Antennal Transcriptome Evaluation and Analysis for Odorant-Binding Proteins, Chemosensory Proteins, and Suitable Reference Genes in the Leaf Beetle Pest Diorhabda rybakowi Weise (Coleoptera: Chrysomelidae)
Source: MDPI journal article supplement (doi:10.3390/insects15040251), 2024-04-07
Supplement: s1 [file s1]

**Table S2. Primer sequences, product sizes, and PCR efficiencies of ten candidate reference genes in *D. rybakowi***

| Gene name     | Primer name    | Primer sequence (5'→3') | Amplification<br>Size (bp) | Efficiency (%) | R <sup>2</sup> | Linear regression equation |
|---------------|----------------|-------------------------|----------------------------|----------------|----------------|----------------------------|
| <i>ACT</i>    | Forward Primer | CGCCAACACTGTTCTTTCCG    | 128                        | 105.1          | 0.99           | Y=-3.2057X+23.736          |
|               | Reverse Primer | ATTTCTTTCTGGGGGAGCG     |                            |                |                |                            |
| <i>TUB</i>    | Forward Primer | CCGACCTCCAACCTCGAAAGAA  | 180                        | 97.7           | 0.99           | Y=-3.3789X+27.063          |
|               | Reverse Primer | TGTTACCTGCACCTGATTGACC  |                            |                |                |                            |
| <i>RPS18</i>  | Forward Primer | GACAAACGTGCGGGAGAA      | 102                        | 99.3           | 0.97           | Y=-3.3378X+24.737          |
|               | Reverse Primer | CTGTTCAAAAACAGTCGGG     |                            |                |                |                            |
| <i>GST</i>    | Forward Primer | CAAGCATAGTGGCTGTAGG     | 153                        | 106.8          | 0.90           | Y=-3.1684X+31.616          |
|               | Reverse Primer | CCGGAGCAAGTTTACTTCTGAC  |                            |                |                |                            |
| <i>SYNT6</i>  | Forward Primer | GTTGAATTGGACGAACAAGCTG  | 126                        | 131.8          | 0.97           | Y=-2.7391X+27.258          |
|               | Reverse Primer | GCCTCCGATCATTAGAAAGTCG  |                            |                |                |                            |
| <i>GAPDH</i>  | Forward Primer | AGTCCCTAACGTTTCAGTCGTC  | 203                        | 100.1          | 0.92           | Y=-3.3198X+30.669          |
|               | Reverse Primer | TGAGTTGGATACCGGCTTTG    |                            |                |                |                            |
| <i>EF1a</i>   | Forward Primer | GACAAAATGCCATGGTTCAAG   | 136                        | 100.5          | 0.99           | Y=-3.3104X+27.173          |
|               | Reverse Primer | GGAGTGGAAGACGAAGAGGTTT  |                            |                |                |                            |
| <i>RPL13a</i> | Forward Primer | CCGTTCCATTTTAGAGCTCCCT  | 158                        | 108.6          | 0.98           | Y=-3.1321X+22.458          |
|               | Reverse Primer | CCAGGTACAACAACACGTTTCC  |                            |                |                |                            |
| <i>RPL19</i>  | Forward Primer | GCCAATGCTCGTACTCCTCAA   | 200                        | 108.1          | 0.97           | Y=-3.1416X+23.163          |
|               | Reverse Primer | CGTGCTTTCTCTGCCTTCTTT   |                            |                |                |                            |
| <i>RPL15</i>  | Forward Primer | GGAATTGATGCATTGTCGTG    | 107                        | 102.5          | 0.92           | Y=-3.2634X+24.228          |
|               | Reverse Primer | GTGGAGGAGCTTCTTTCTTGGT  |                            |                |                |                            |
